# Supplementary material
Source: MDPI journal article supplement (https://www.mdpi.com/2227-9717/8/11/1411)
Supplement: s1 [file s1]

# Polyphenolic Profiling of Forestry Waste by UPLC-HDMS<sup>E</sup>

Colin M. Potter <sup>1,\*</sup> and David L. Jones <sup>1,2</sup>

<sup>1</sup> Centre for Environmental Biotechnology, School of Natural Sciences, Bangor University, Gwynedd, Bangor LL57 2UW, UK; d.jones@bangor.ac.uk

<sup>2</sup> UWA School of Agriculture and Environment, The University of Western Australia, Perth, WA 6009, Australia

\* Correspondence: colin.potter@bangor.ac.uk

**Supplementary information**

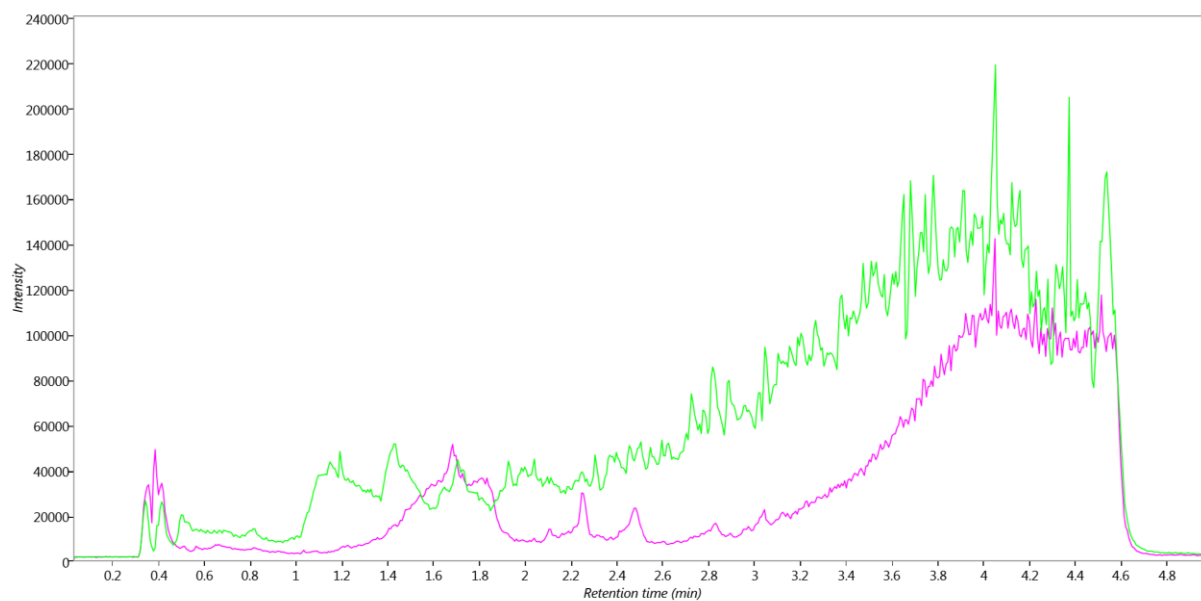

**Figure S1.** Total ion chromatogram of Lodge Pole Pine (green) and the alignment reference (magenta).

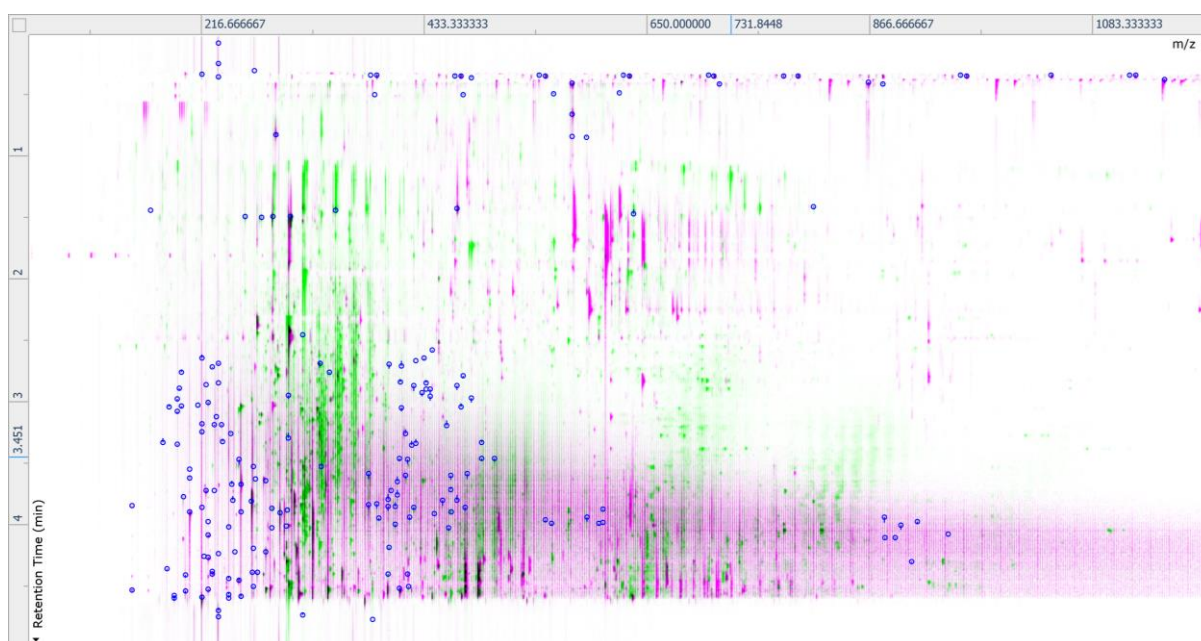

**Figure S2.** Ion intensity map of Lodge Pole Pine (green) and the alignment reference (magenta) used in vector editing.

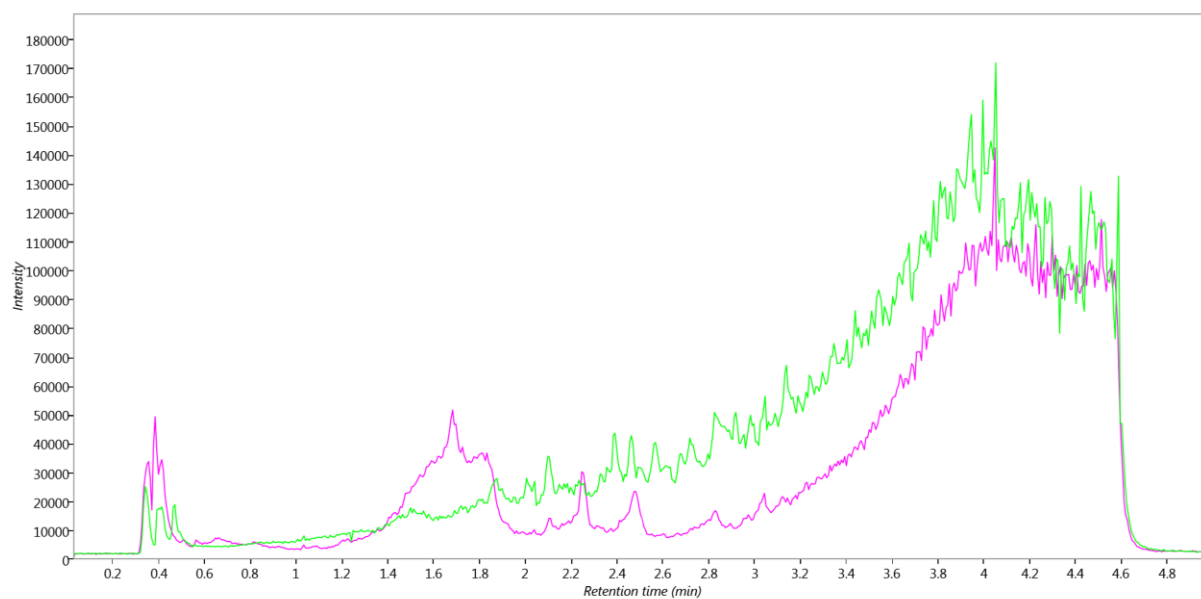

**Figure S3.** Total ion chromatogram of Oak (green) and the alignment reference (magenta).

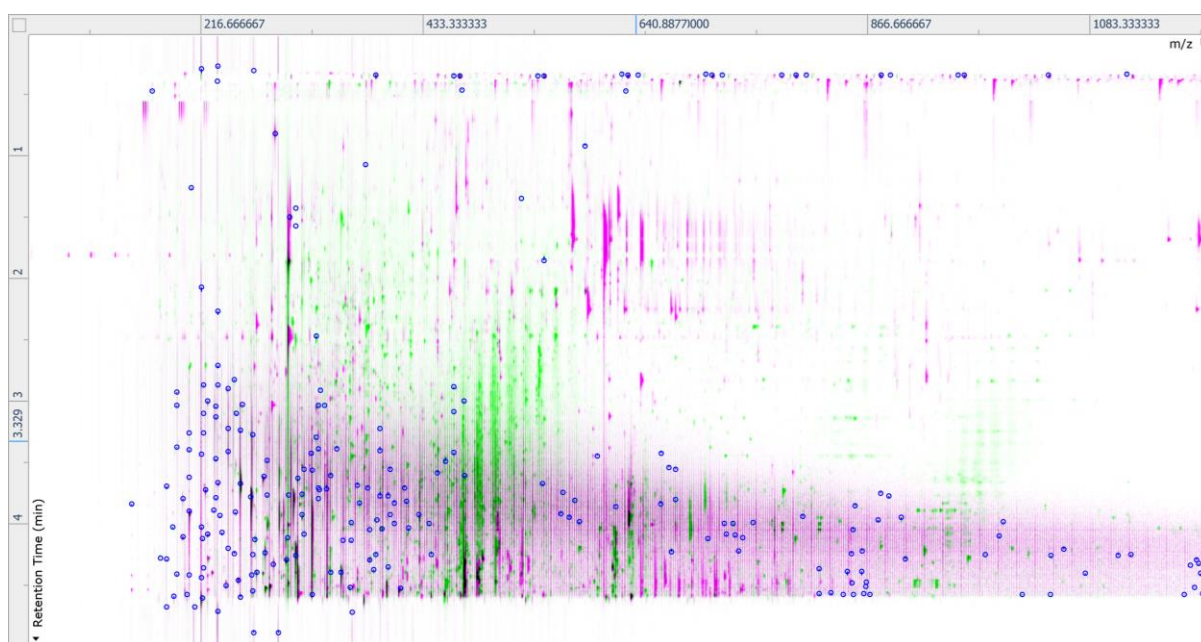

**Figure S4.** Ion intensity map of Oak (green) and the alignment reference (magenta) used in vector editing.

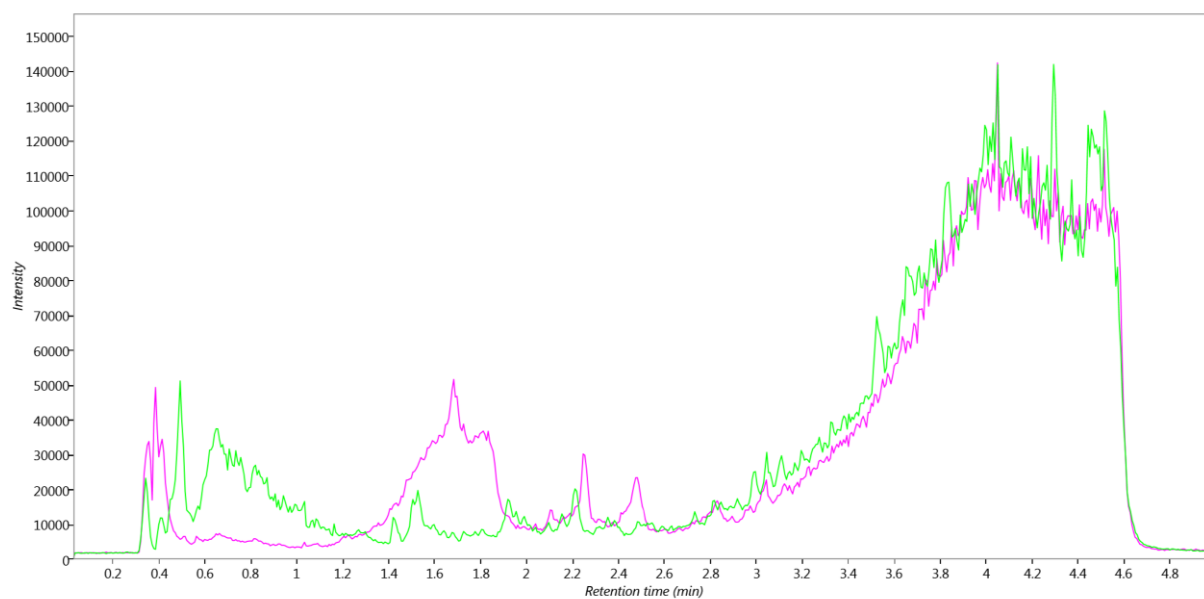

**Figure S5.** Total ion chromatogram of Scots Pine (green) and the alignment reference (magenta).

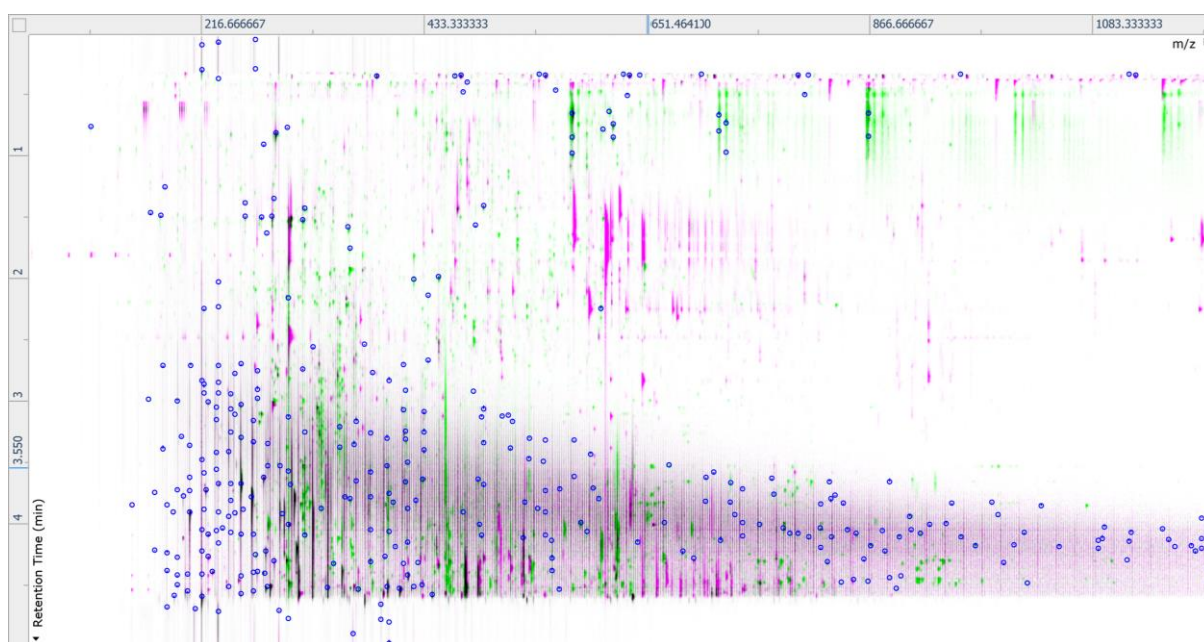

**Figure S6.** Ion intensity map of Scots Pine (green) and the alignment reference (magenta) used in vector editing.

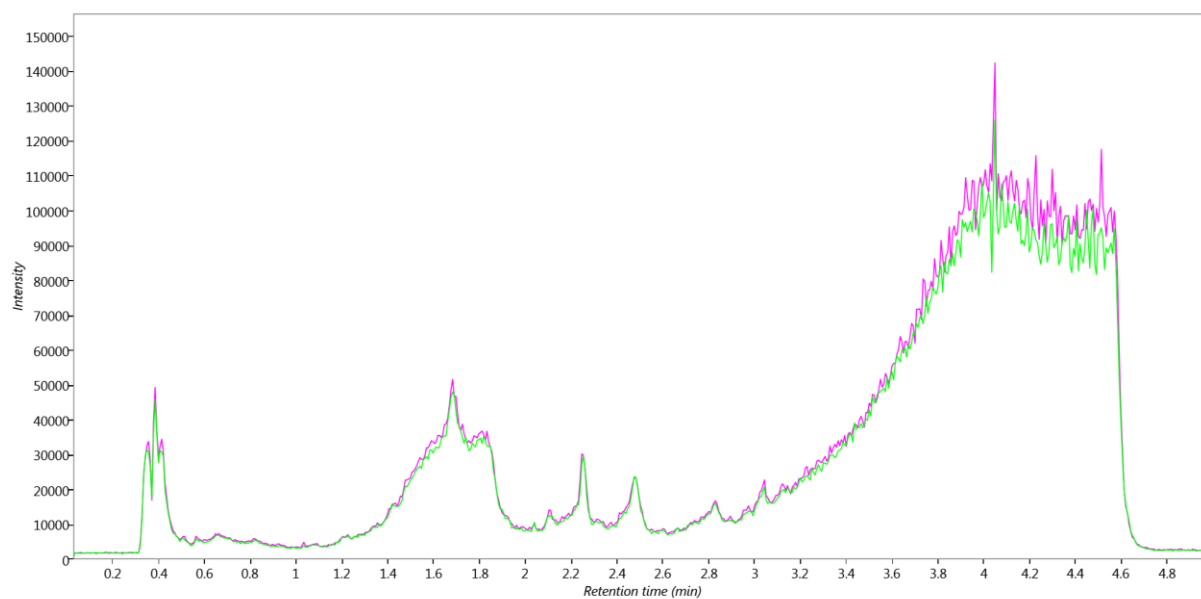

**Figure S7.** Total ion chromatogram of Pycnogenol (green) and the alignment reference (magenta).

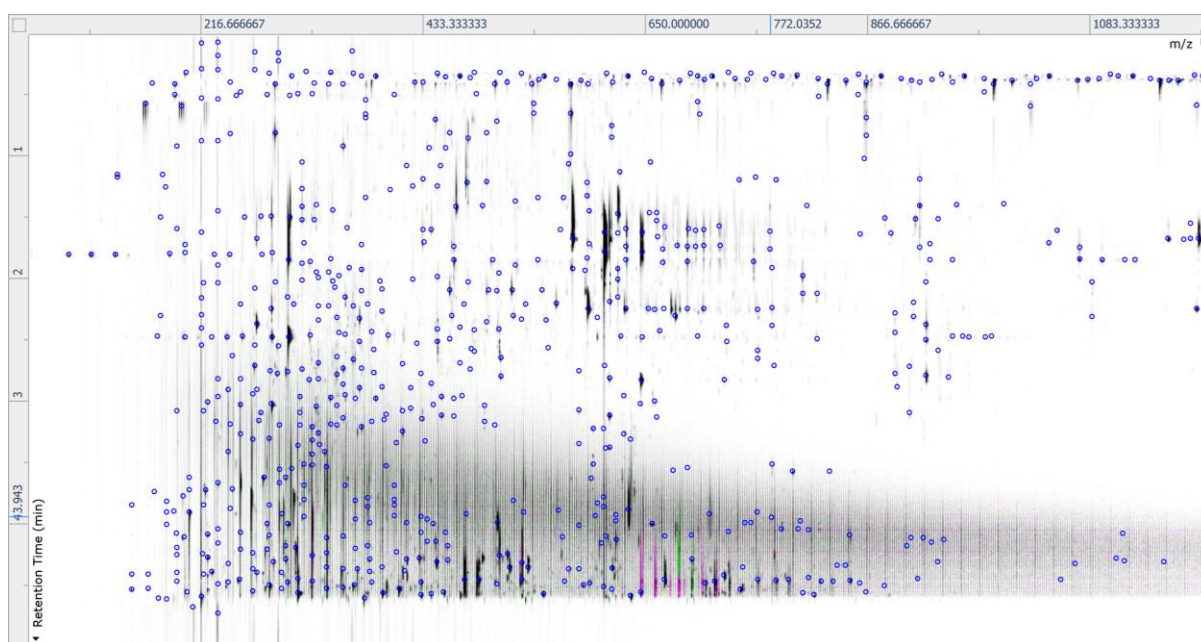

**Figure S8.** Ion intensity map of Pycnogenol (green) and the alignment reference (magenta) used in vector editing.

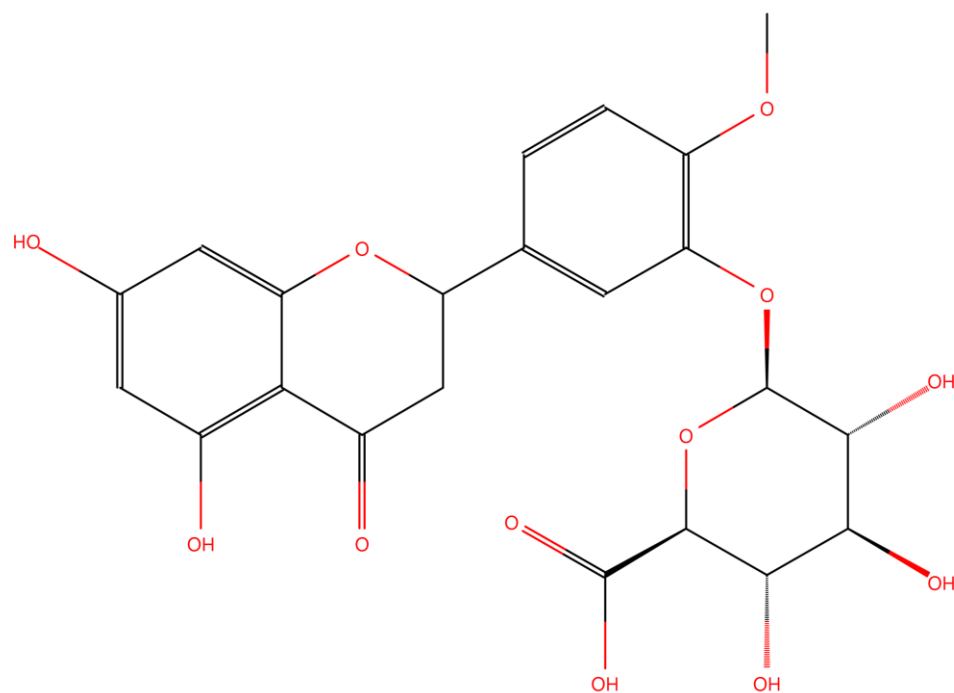

Isorhamnetin 3-glucoside - CSID32056973

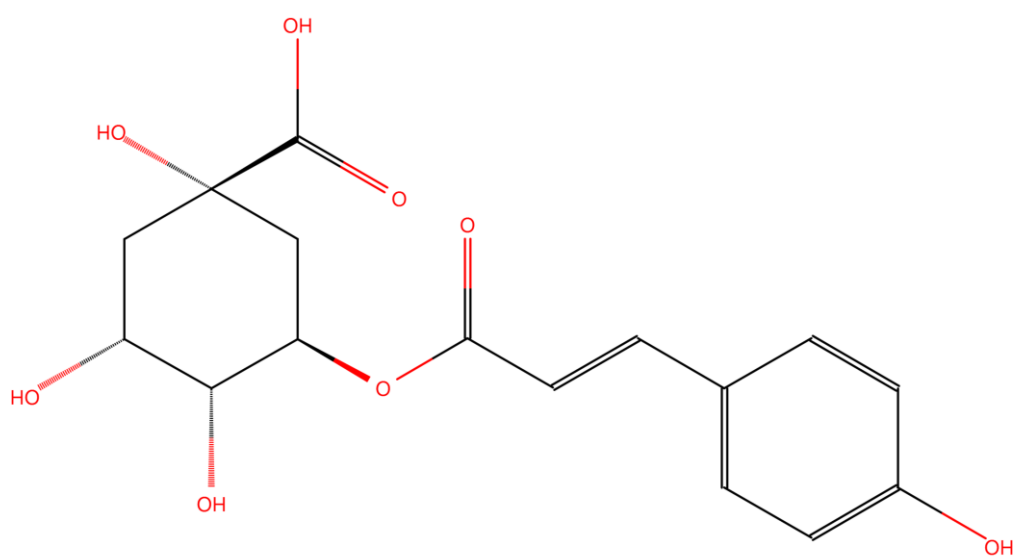*trans*-5-O-(4-coumaroyl)-D-quinic acid - CSID4945466

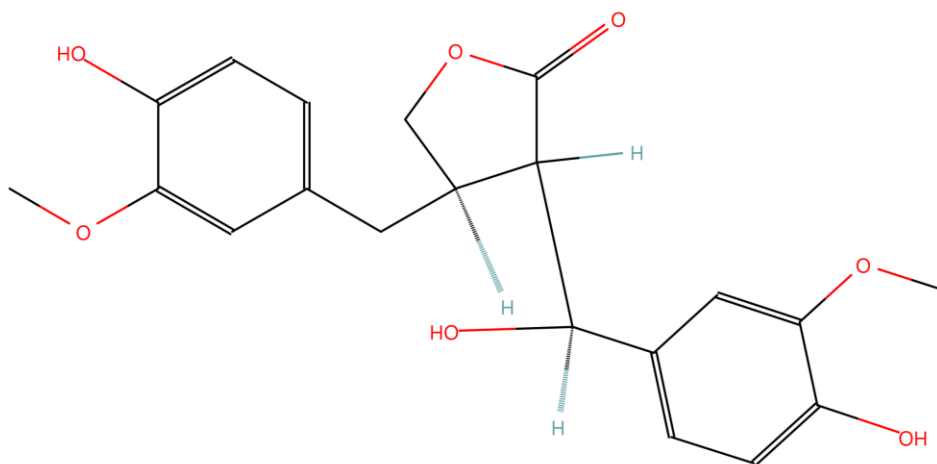

7-Hydroxymatairesinol - CSID59696173

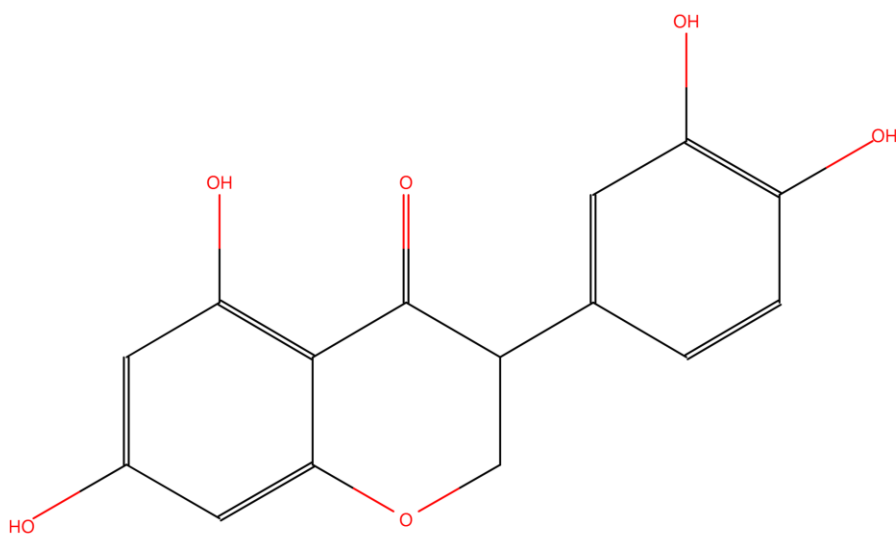

3-(3,4-Dihydroxyphenyl)-5,7-dihydroxy-2,3-dihydro-4H-chromen-4-one - CSID35015212

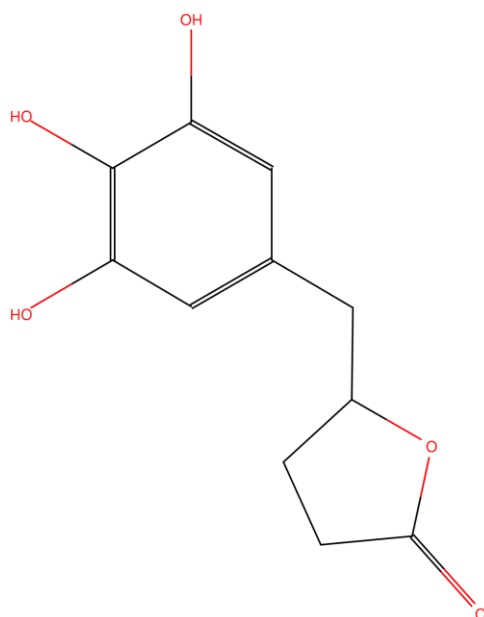

5-(3,4,5-Trihydroxybenzyl)dihydro-2(3H)-furanone - CSID23245203

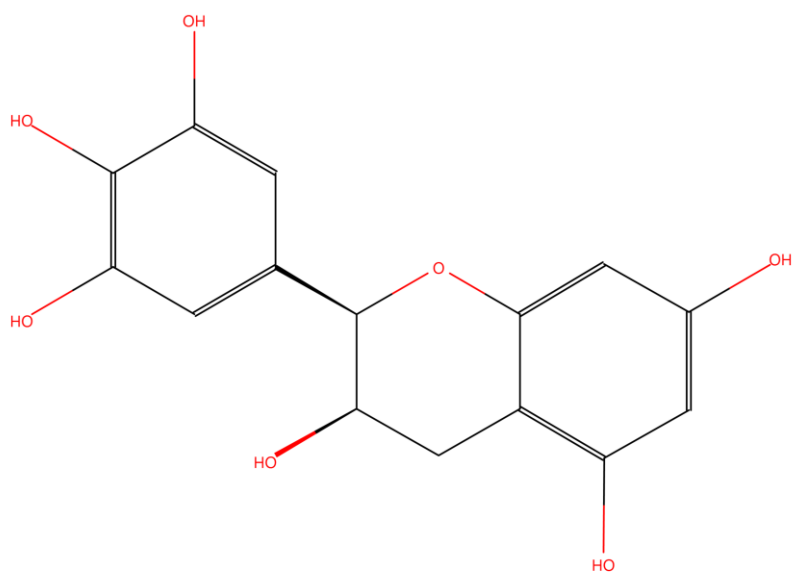

(-)-Epigallocatechin - CSID65231



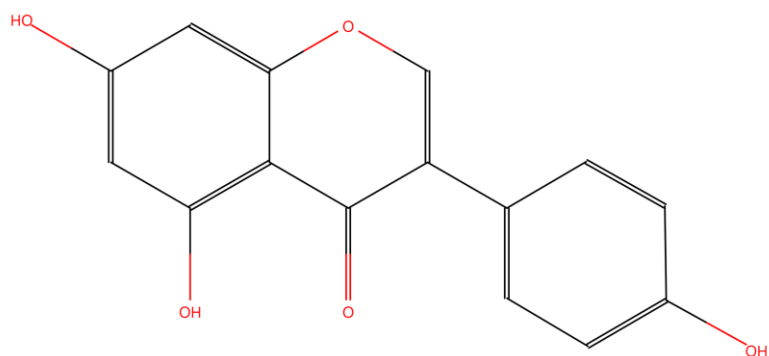

Genistein - CSID4444448

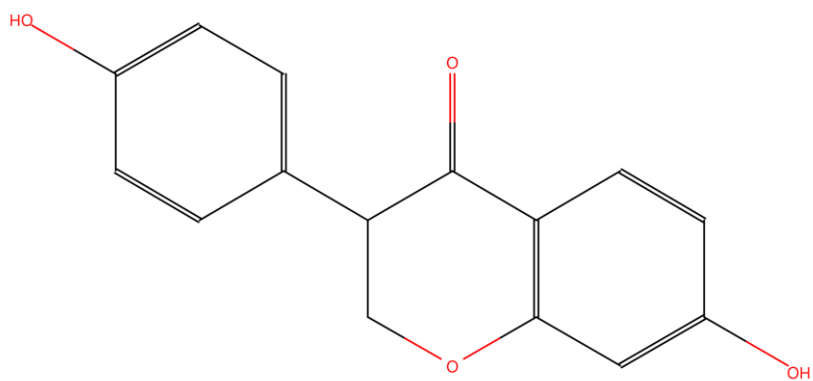

Dihydrodaidzein - CSID154076

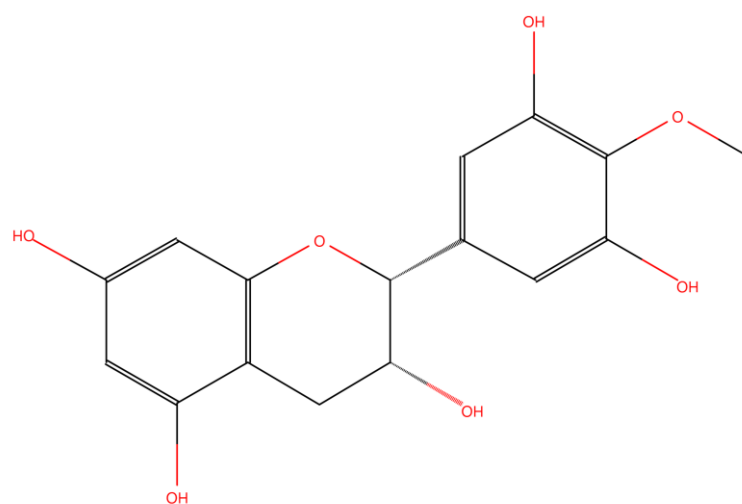

4'-Methylepigallocatechin - CSID154086

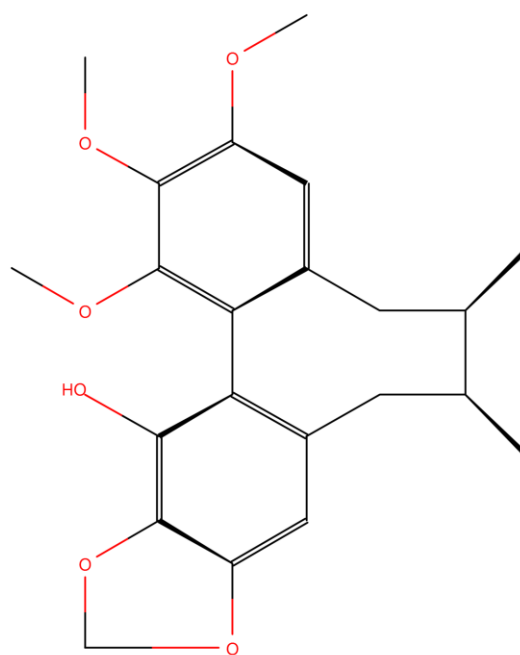

Gomisin M2 - CSID10278518

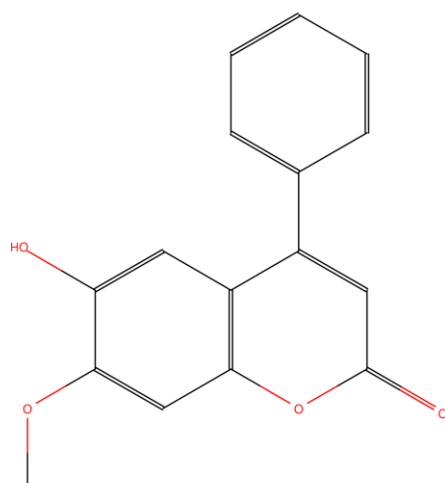

Dalbergin - CSID391108

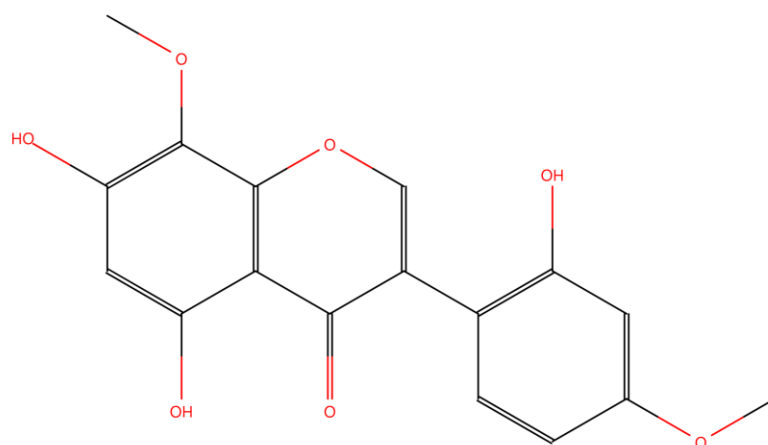

5,7-Dihydroxy-3-(2-hydroxy-4-methoxyphenyl)-8-methoxy-4H-chromen-4-one - CSID30777598

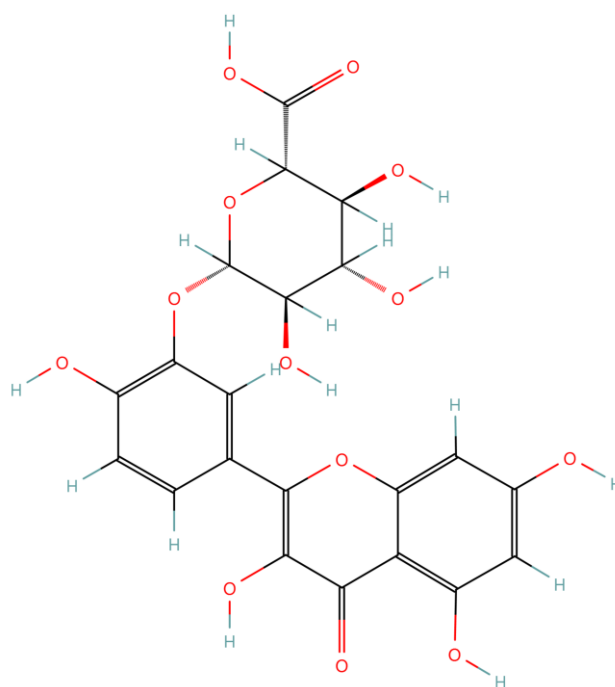

Quercetin-3'-Glucuronide - CSID9830649

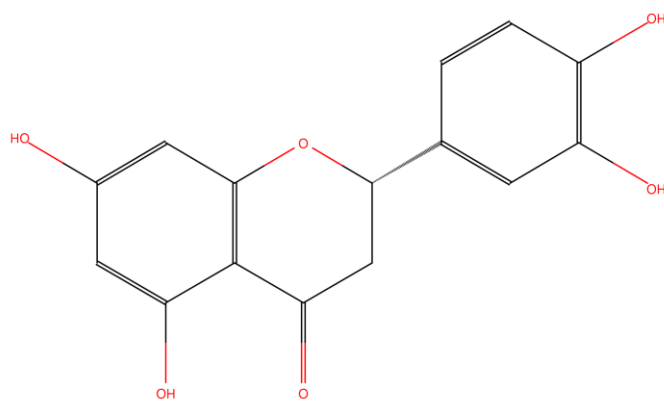

Eriodictyol - CSID389606

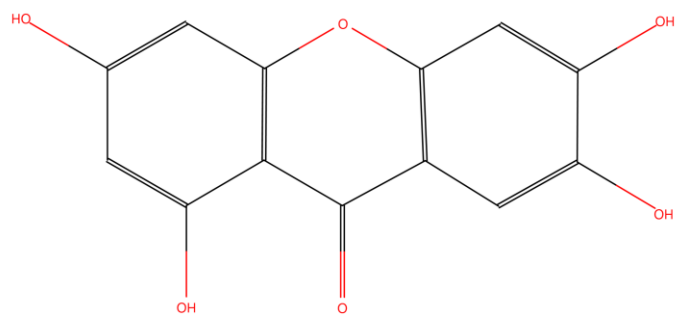

Norathyriol - CSID4444975

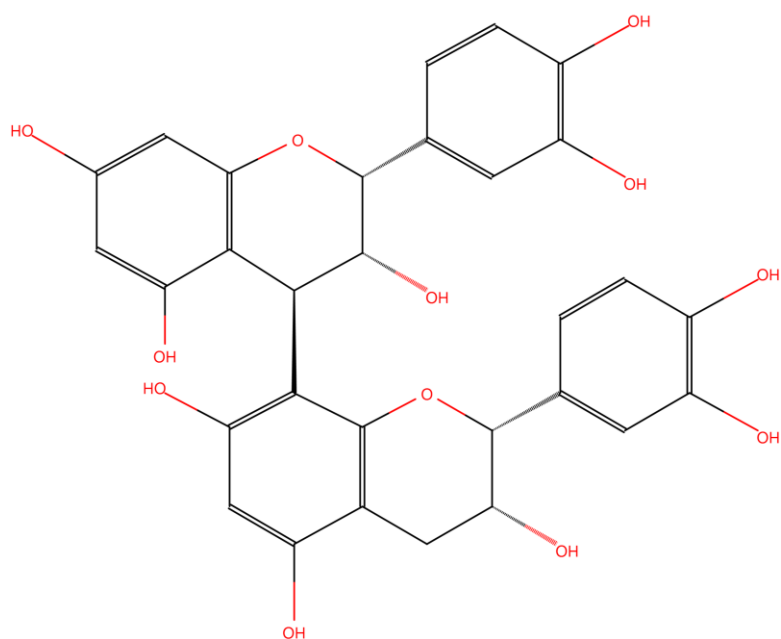

Procyanidin B2 - CSID109417

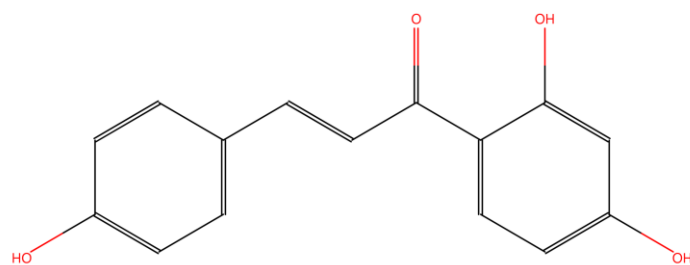

Isoliquiritigenin - CSID553829

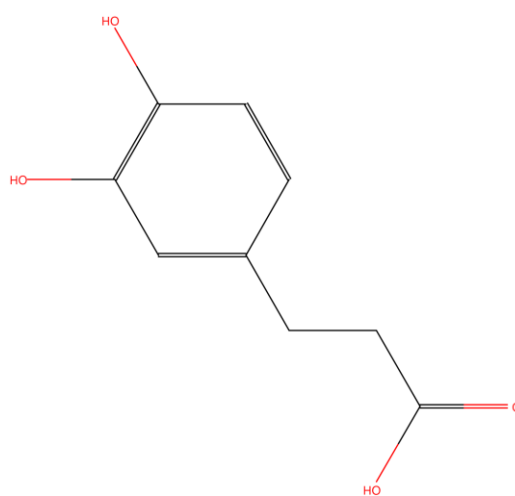

Dihydrocaffeic acid - CSID308986

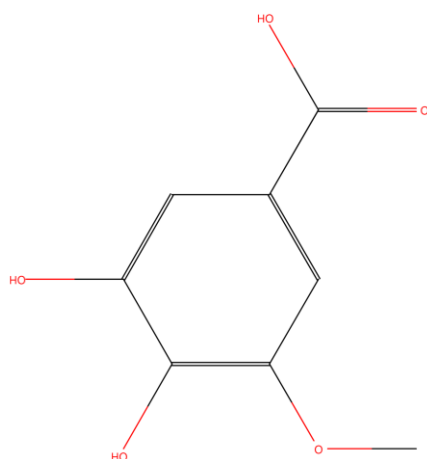

3,4-Dihydroxy-5-methoxybenzoic acid - CSID18679

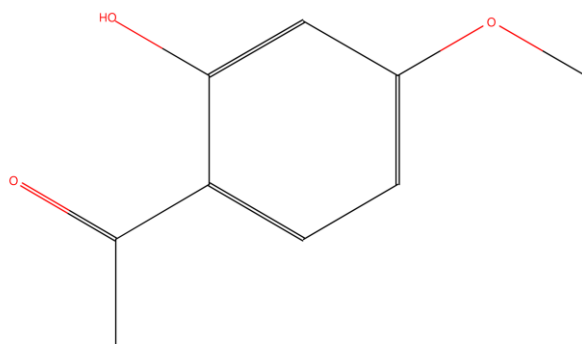

Paeonol - CSID10621

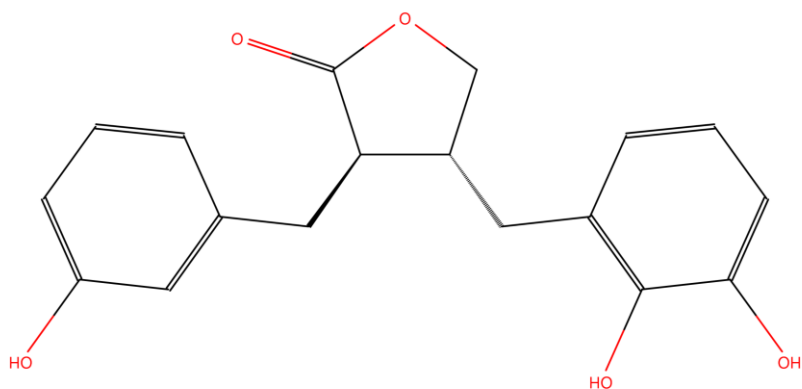

(3R,4R)-4-(2,3-Dihydroxybenzyl)-3-(3-hydroxybenzyl)dihydro-2(3H)-furanone - CSID30777587

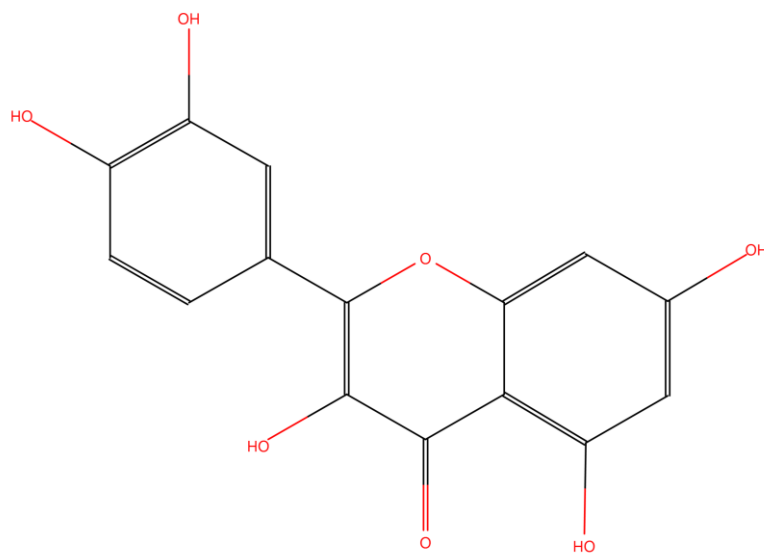

Quercetin - CSID4444051



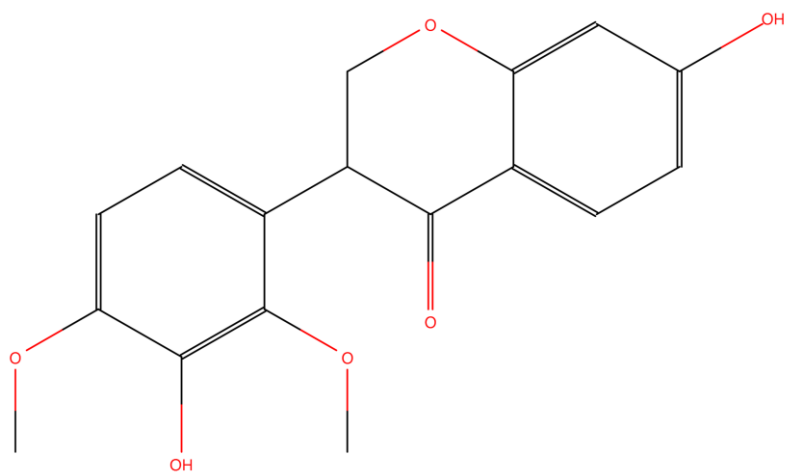

7-Hydroxy-3-(3-hydroxy-2,4-dimethoxyphenyl)-2,3-dihydro-4H-chromen-4-one - CSID24842912

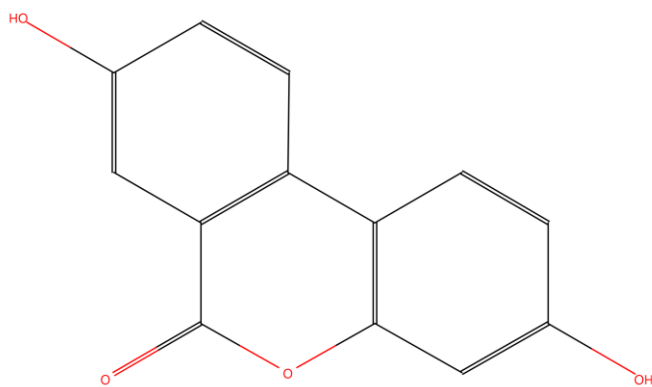

Urolithin A - CSID4589709

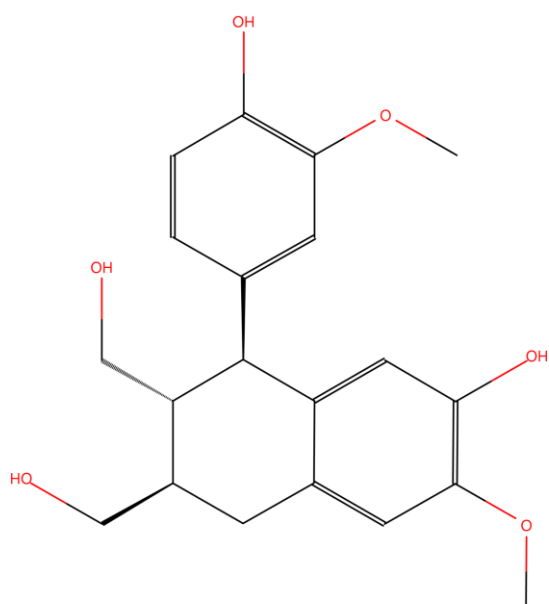

(+)-Isolariciresinol - CSID141054

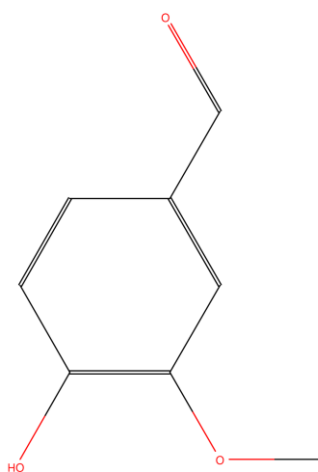

Vanillin - CSID13860434

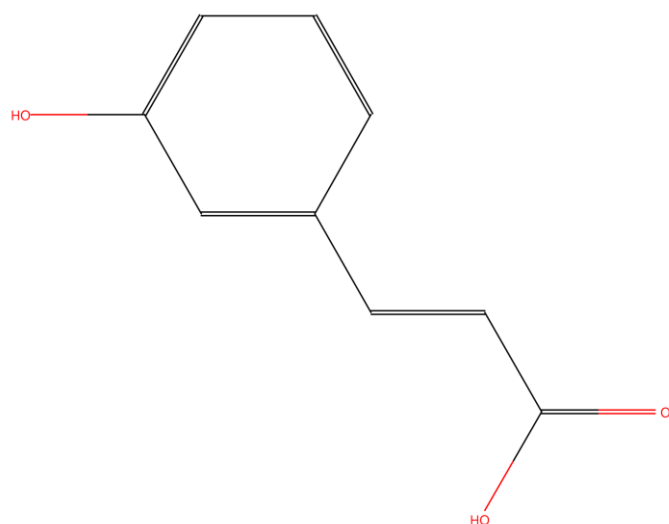

m-Coumaric acid - CSID553147

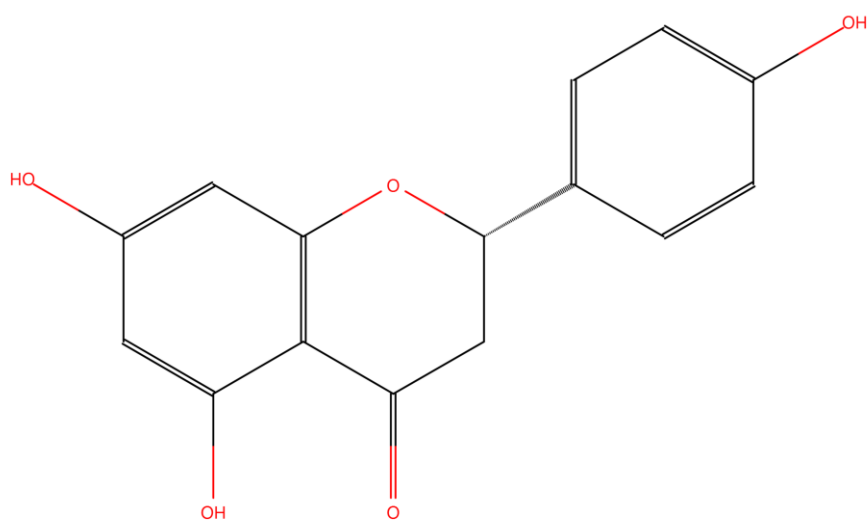

Naringenin - CSID388383

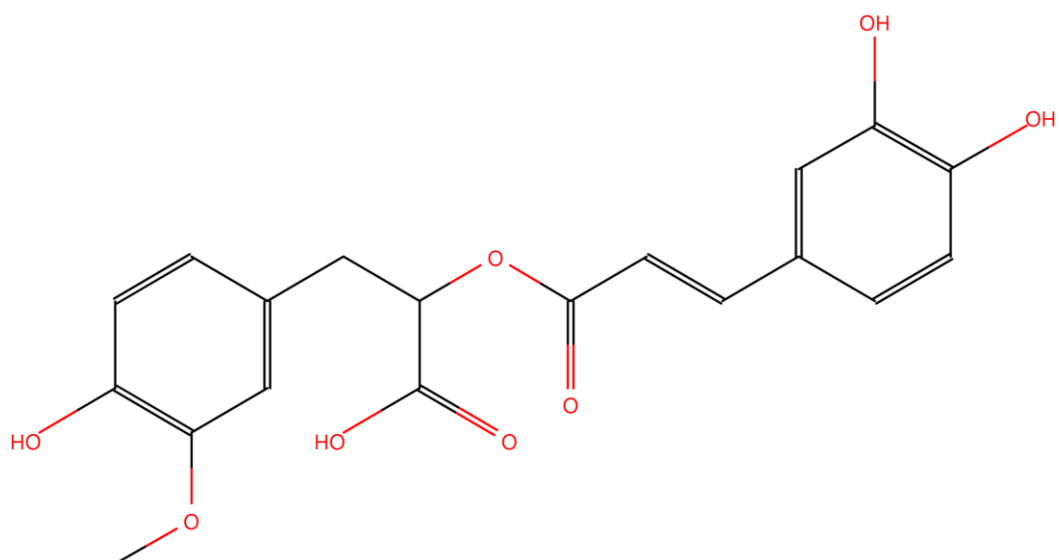

3-O-Methylrosmarinic acid - CSID35015215

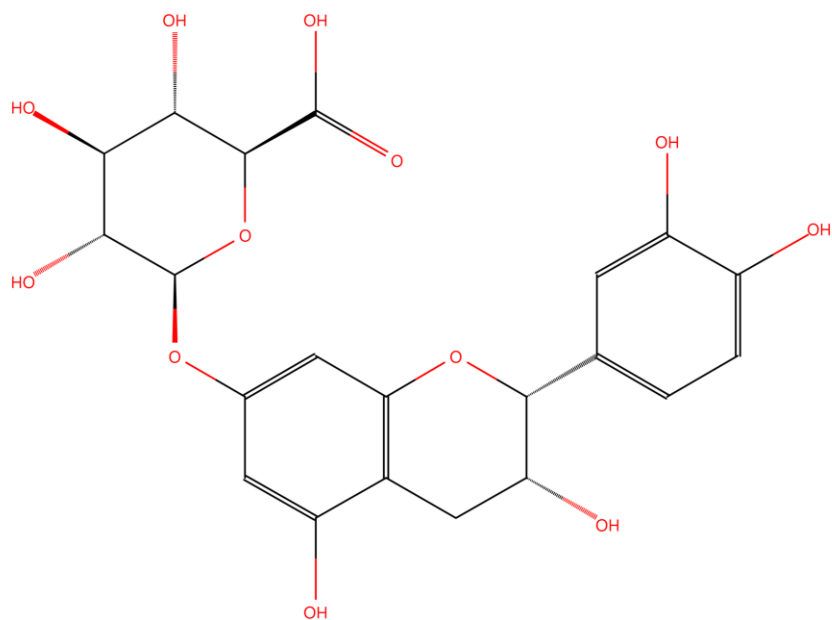

Epicatechin-glucuronide - CSID30777622

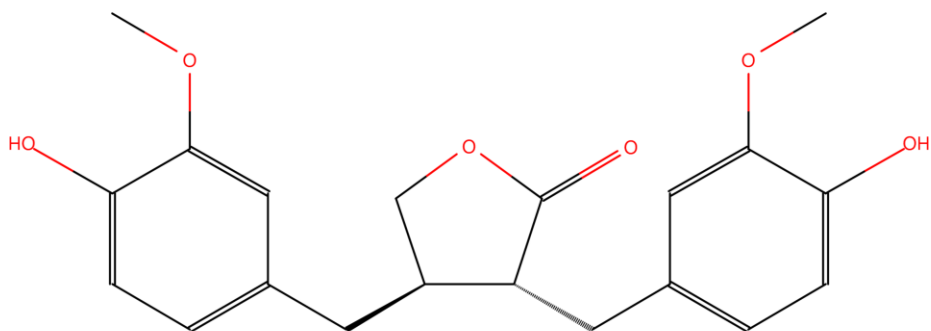

Matairesinol - CSID106491

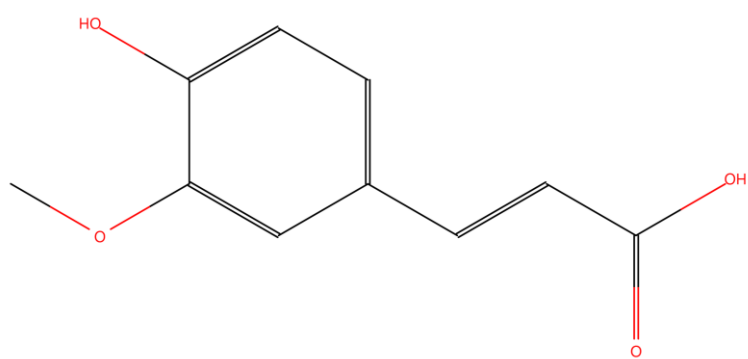

Ferulic acid - CSID689

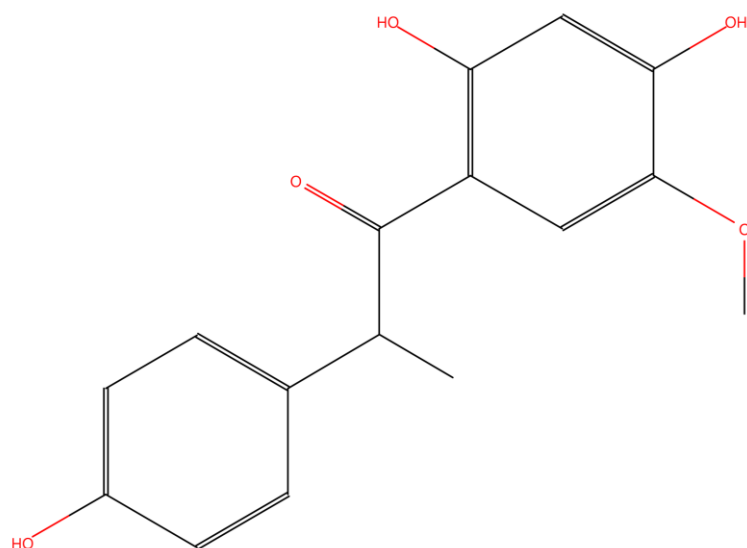

5'-Methoxy-O-desmethylangolensin - CSID28554480

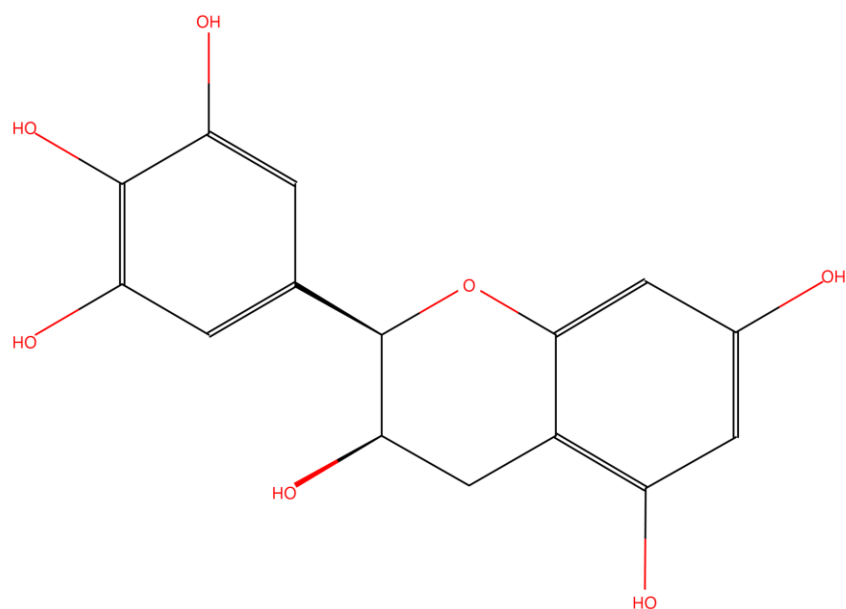

(-)-Epigallocatechin - CSID65231

**Figure S9.** Molecular structures of identifications ordered from high to low score value.

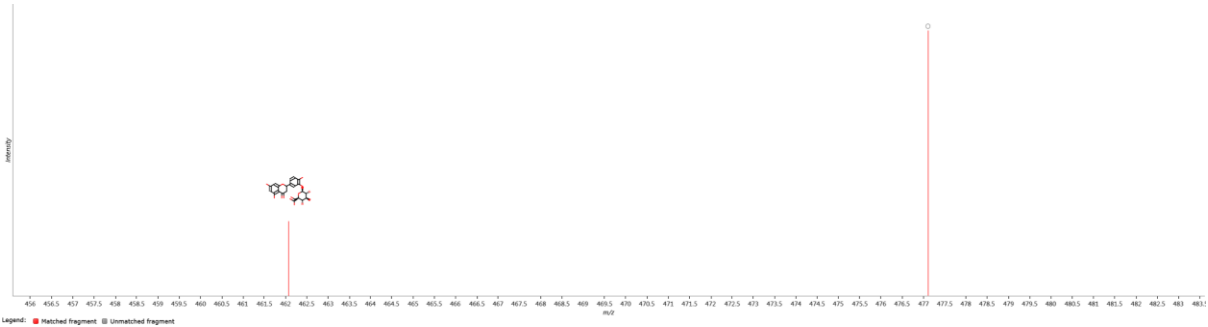

Isorhamnetin 3-glucoside fragmentation trace

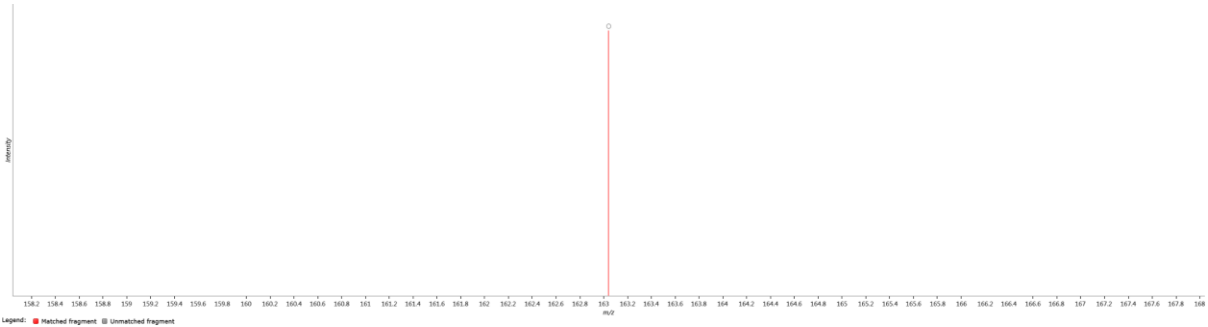

*trans*-5-*O*-(4-coumaroyl)-D-quinic acid fragmentation trace

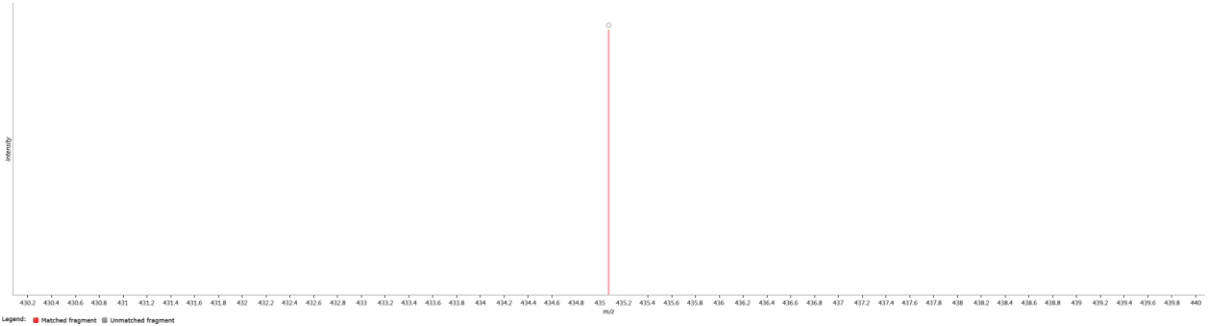

3-(3,4-Dihydroxyphenyl)-5,7-dihydroxy-2,3-dihydro-4H-chromen-4-one fragmentation trace

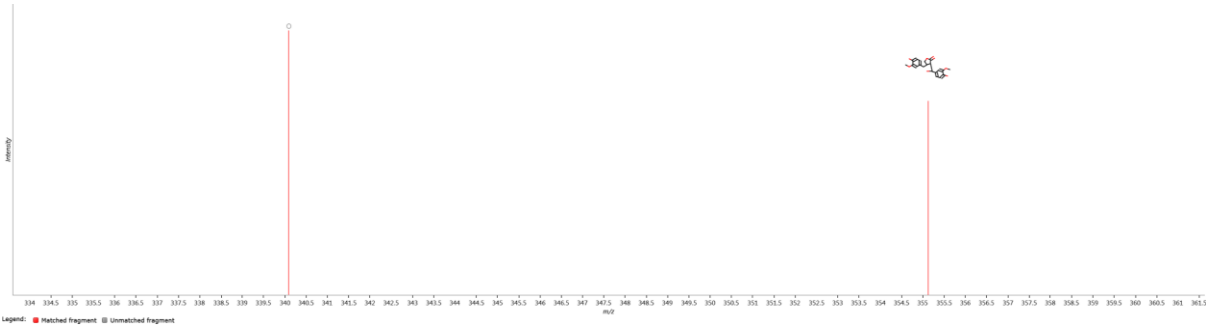

7-Hydroxymatairesinol fragmentation trace

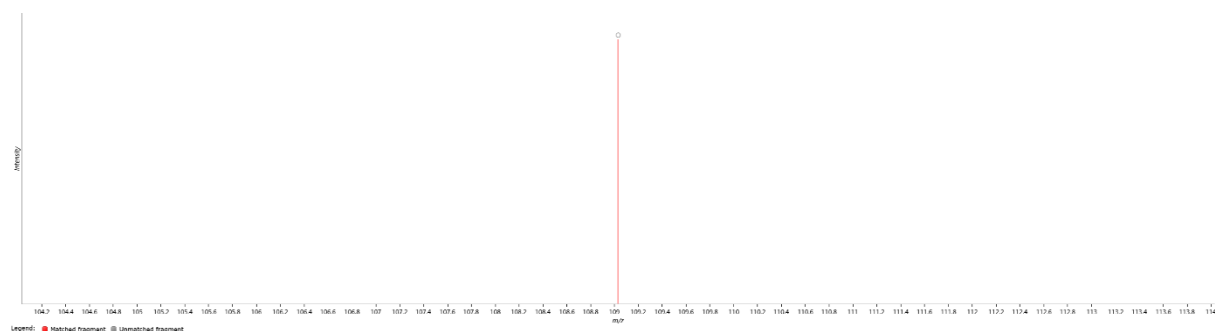

3-(3,4-Dihydroxyphenyl)-2-methoxypropanoic acid fragmentation trace

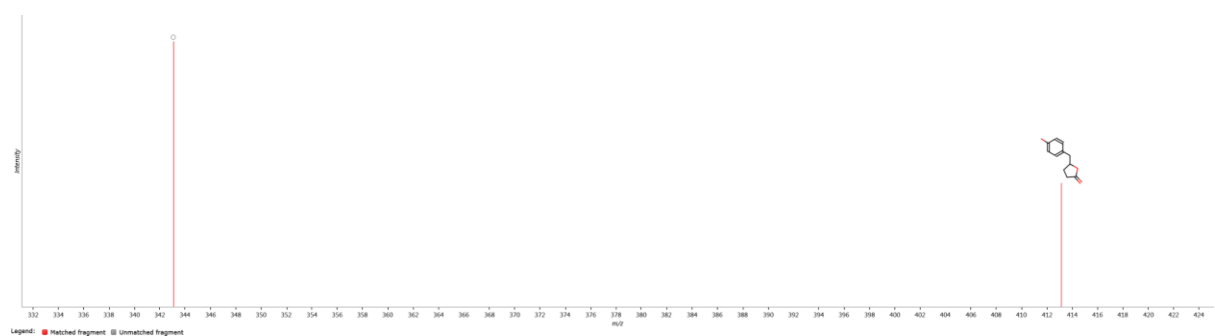

5-(3,4,5-Trihydroxybenzyl)dihydro-2(3H)-furanone fragmentation trace

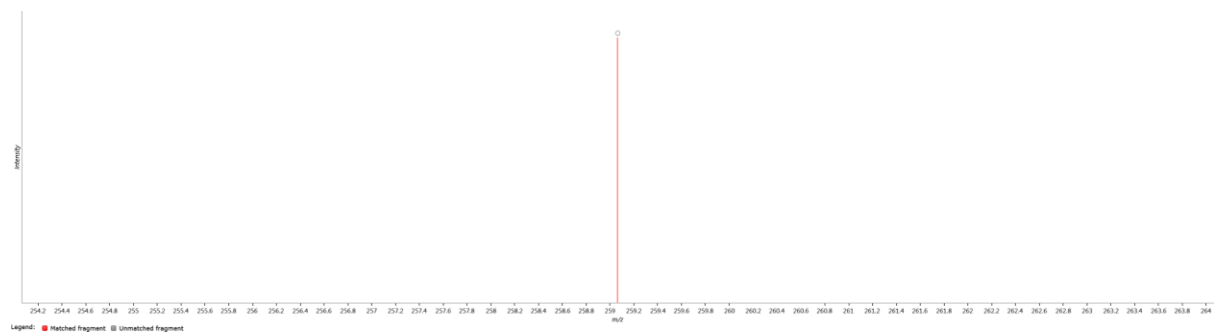

(-)-Epigallocatechin fragmentation trace

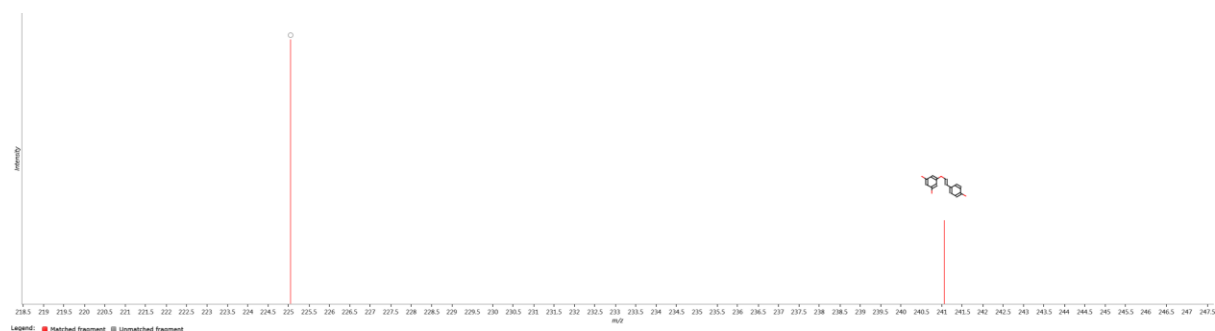

Genistein fragmentation trace



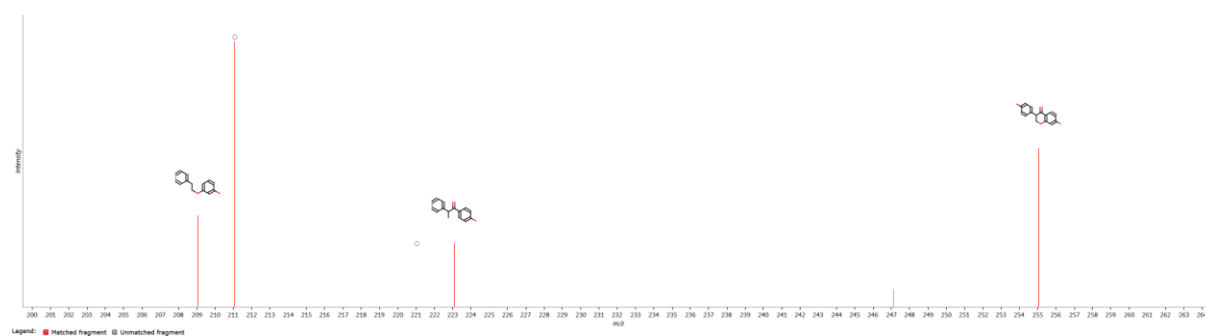

Dihydrodaidzein fragmentation trace

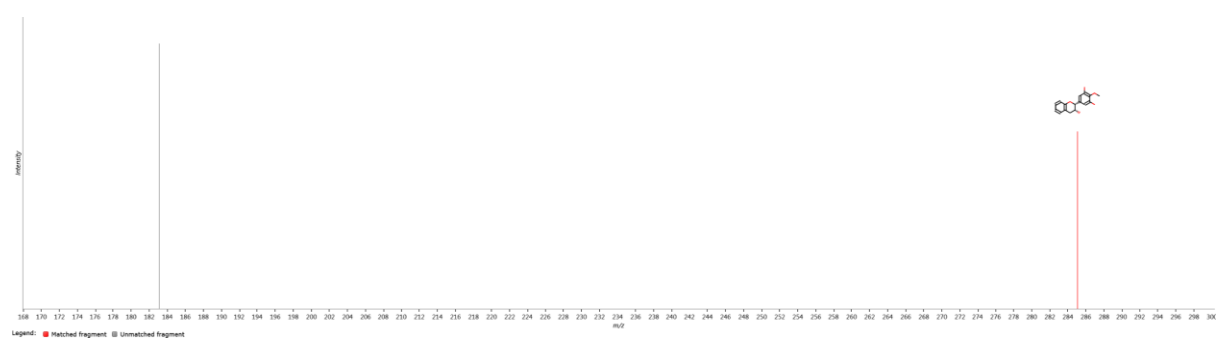

4'-Methylepigallocatechin ragmentation trace

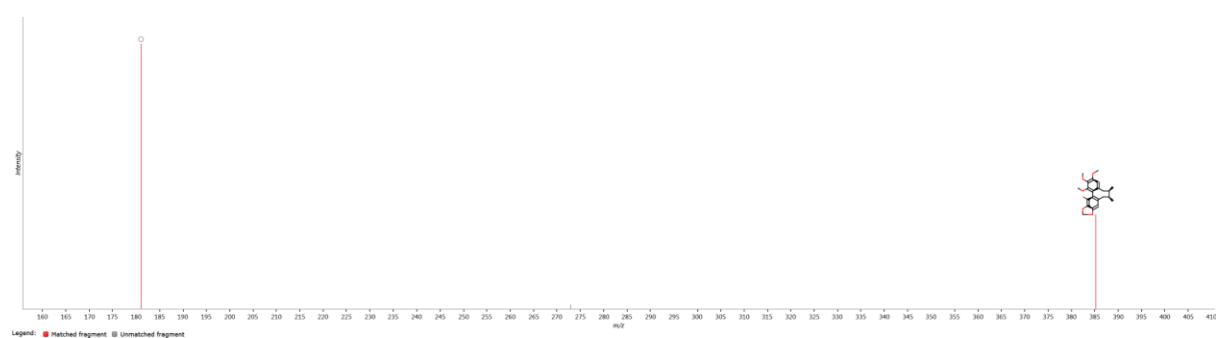

Gomisin M2 fragmentation trace

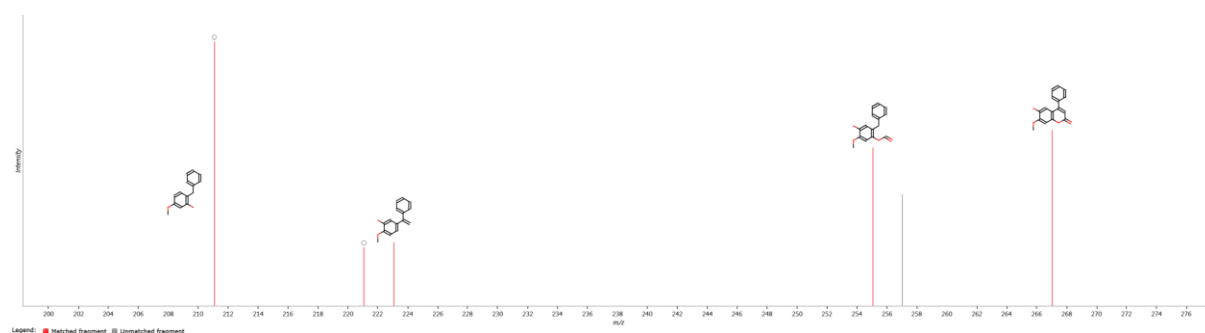

Dalbergin fragmentation trace

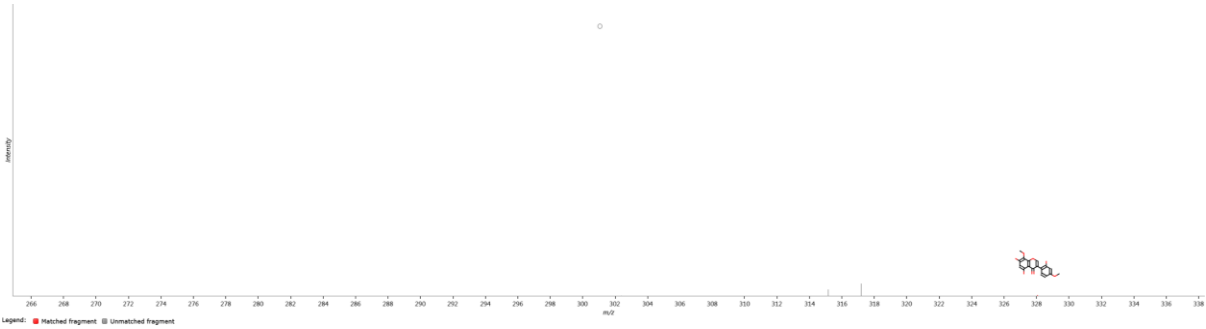

5,7-Dihydroxy-3-(2-hydroxy-4-methoxyphenyl)-8-methoxy-4H-chromen-4-one fragmentation trace

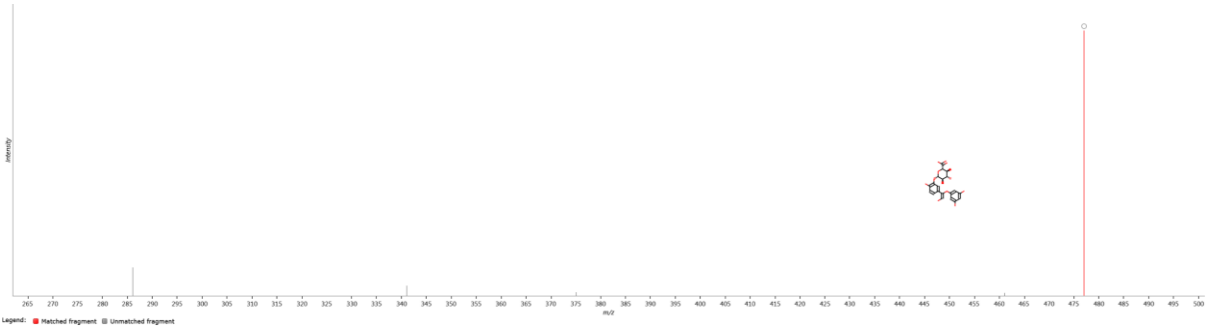

Quercetin-3'-glucuronide fragmentation trace

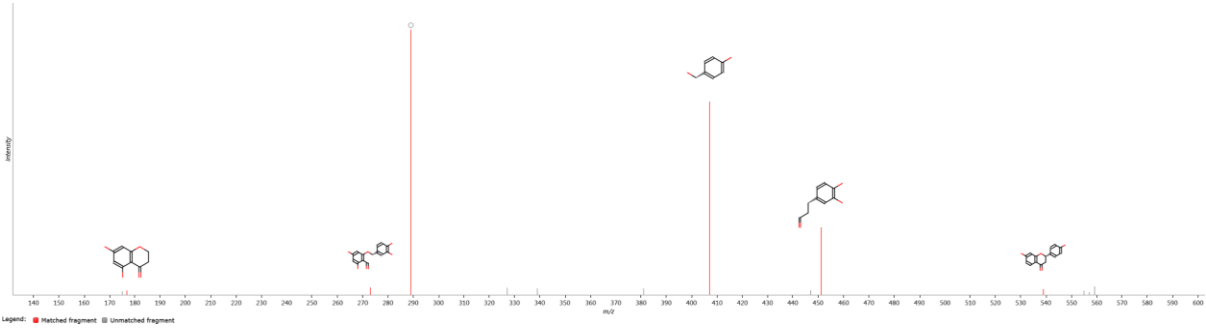

Eriodictyol fragmentation trace

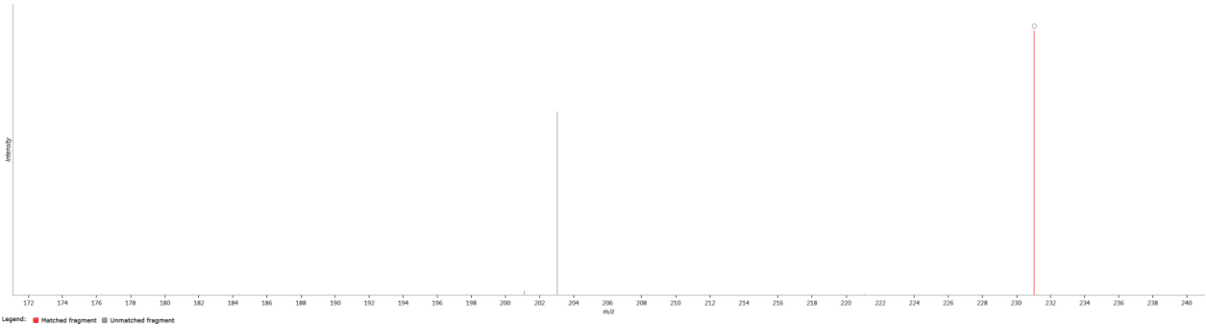

Norathyriol fragmentation trace

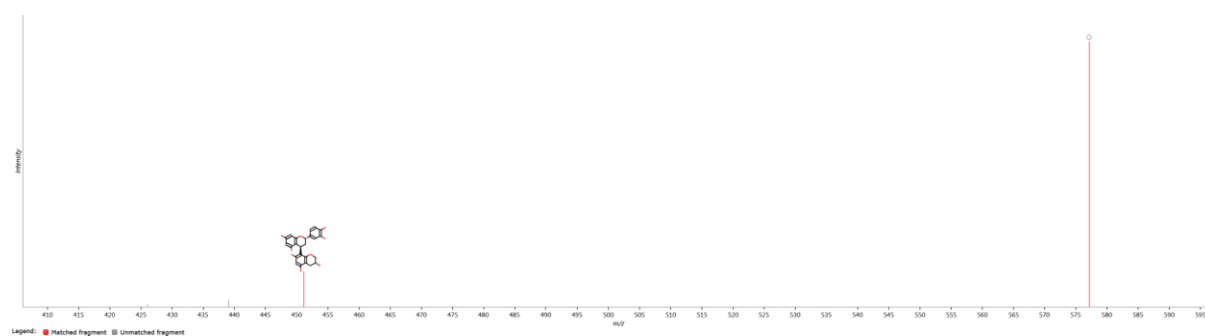

Procyanidin B1, B2, B3 or B4 fragmentation trace

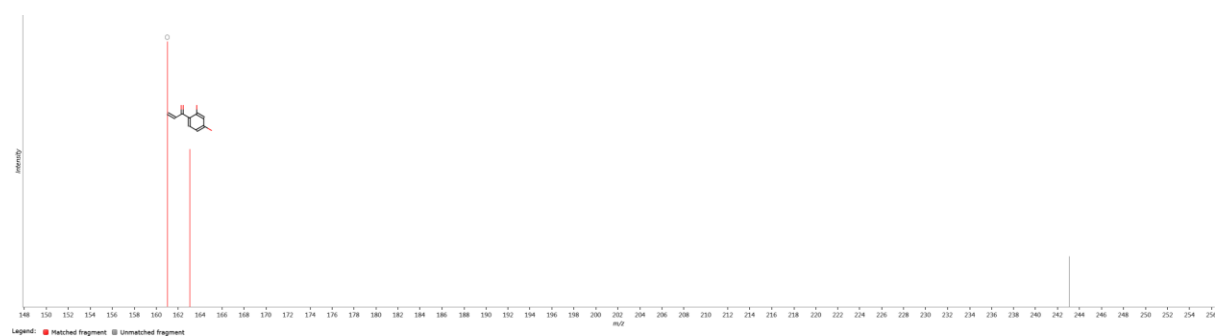

Isoliquiritigenin fragmentation trace

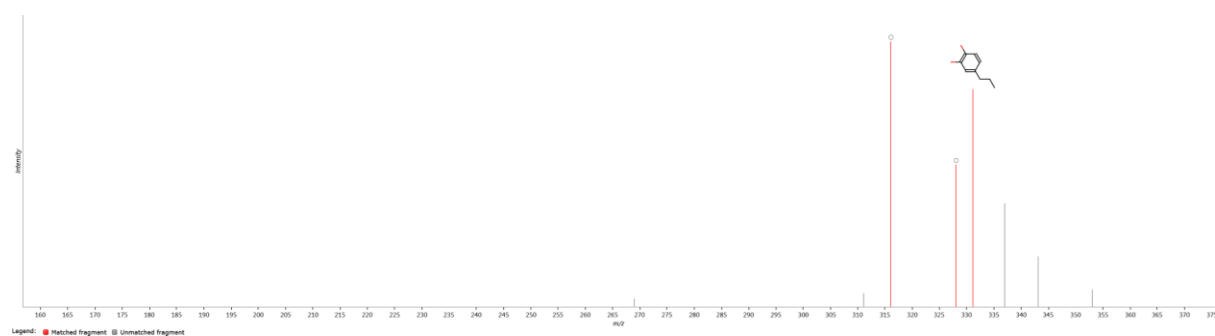

Dihydrocaffeic acid fragmentation trace

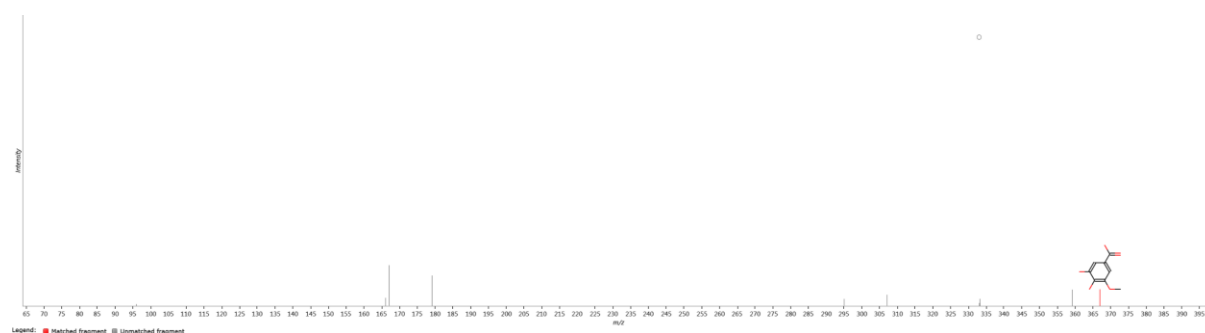

3,4-Dihydroxy-5-methoxybenzoic acid fragmentation trace

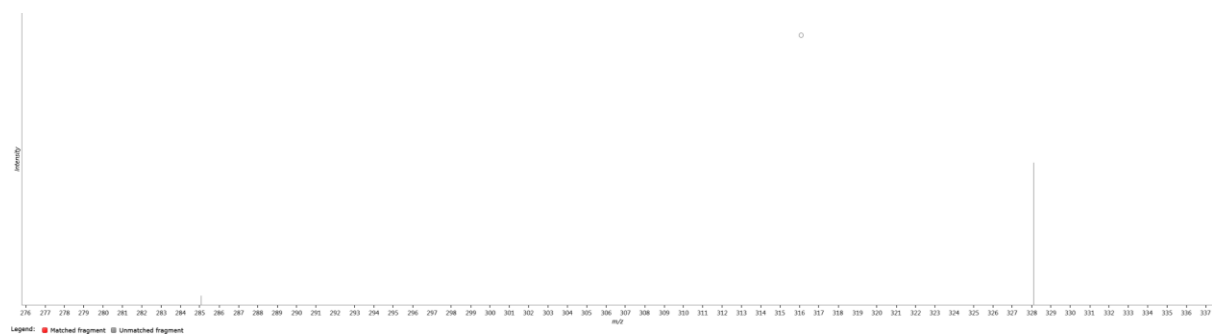

Paeonol fragmentation trace

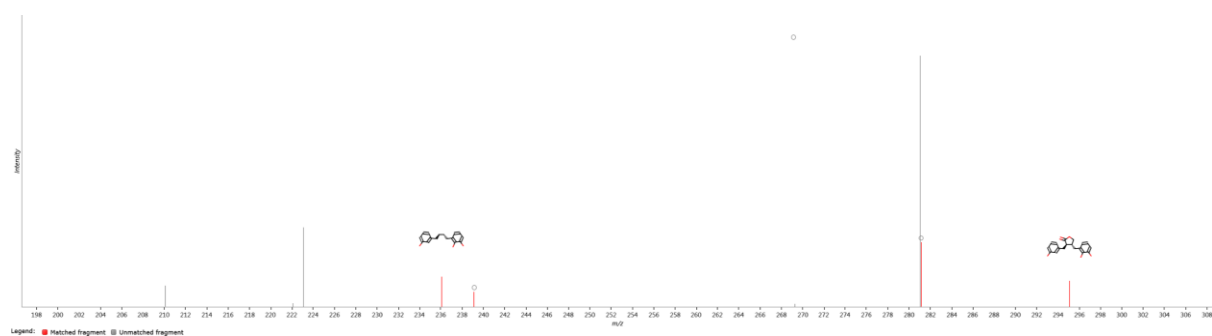

(3R,4R)-4-(2,3-Dihydroxybenzyl)-3-(3-hydroxybenzyl)dihydro-2(3H)-furanone fragmentation trace

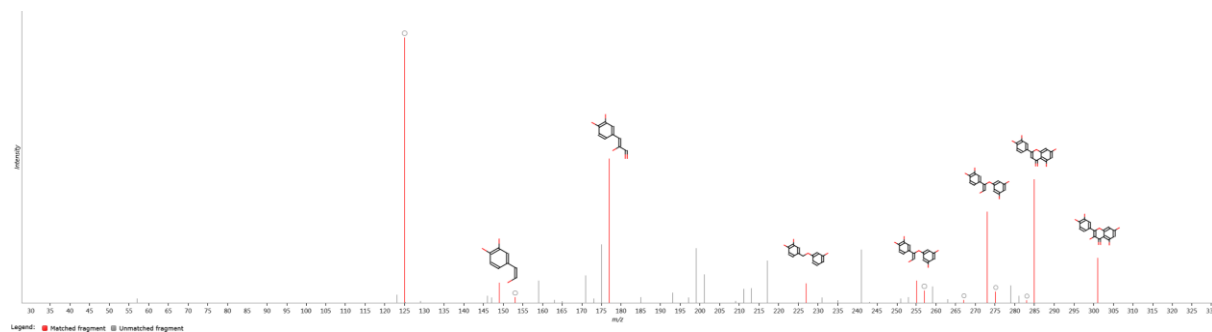

Quercetin fragmentation trace

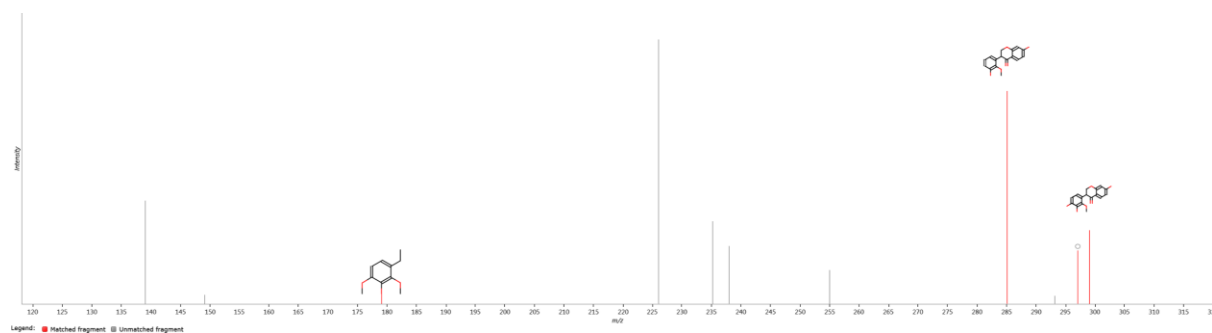

7-Hydroxy-3-(3-hydroxy-2,4-dimethoxyphenyl)-2,3-dihydro-4H-chromen-4-one fragmentation trace

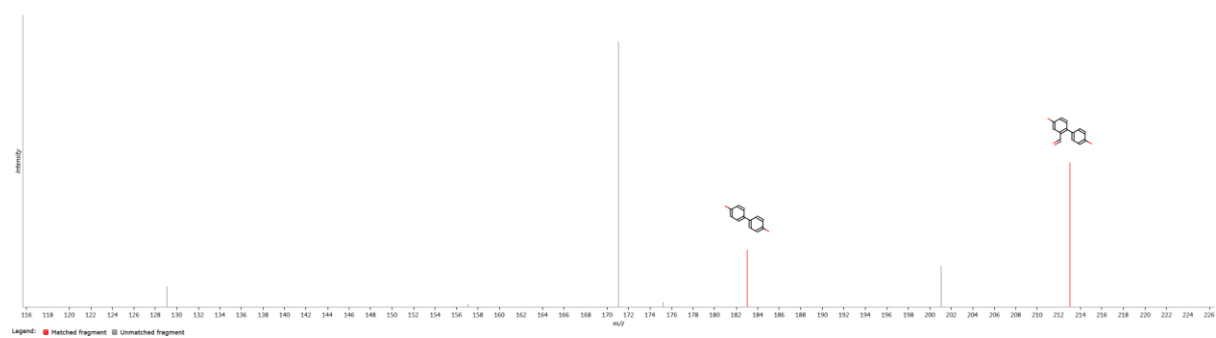

Urolithin A fragmentation trace

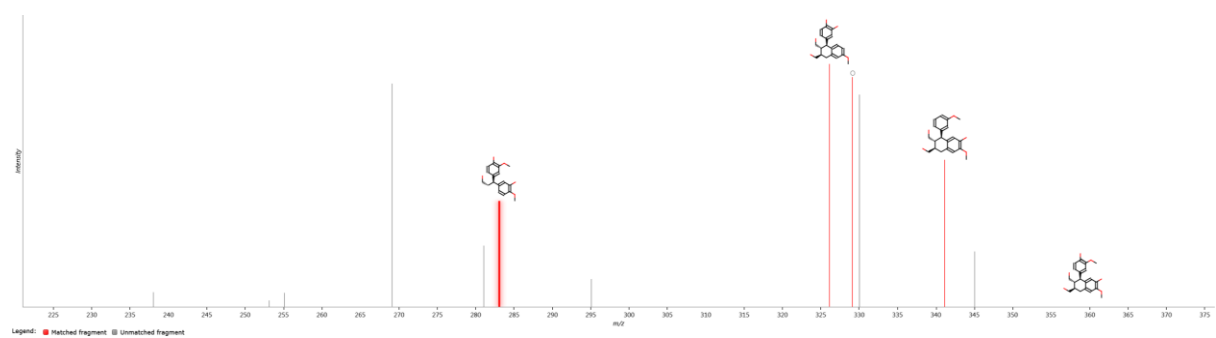

(+)–Isolariciresinol fragmentation trace

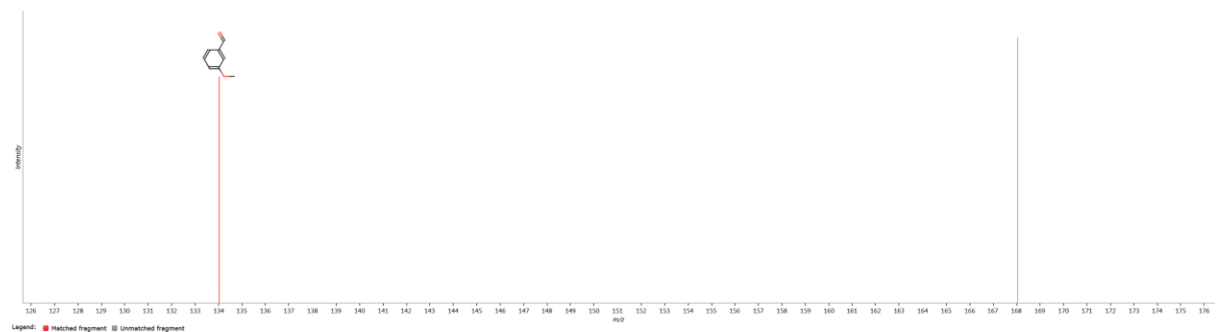

Vanillin fragmentation trace

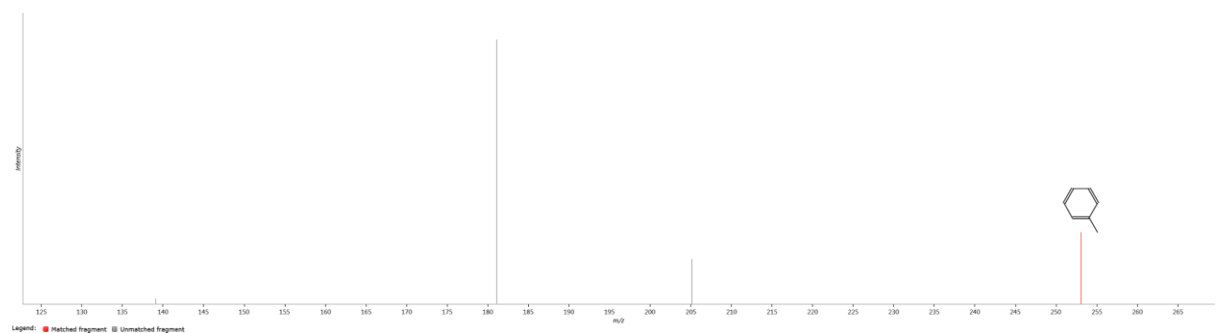

Meta or para-coumaric acid fragmentation trace

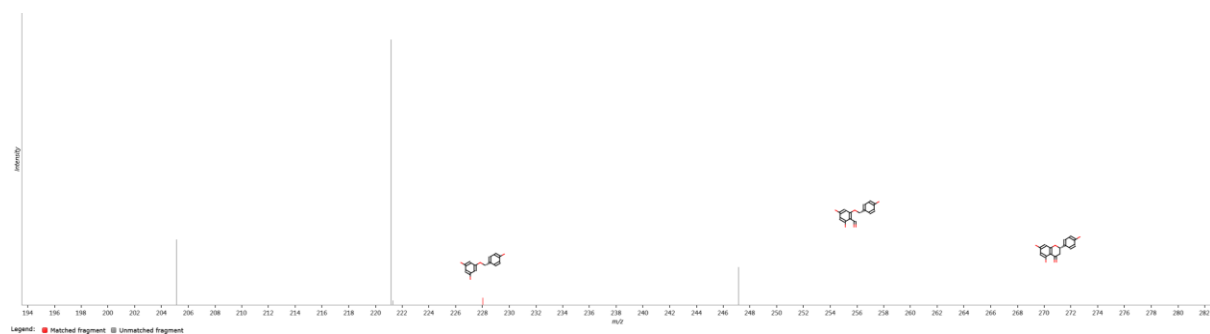

Naringenin fragmentation trace

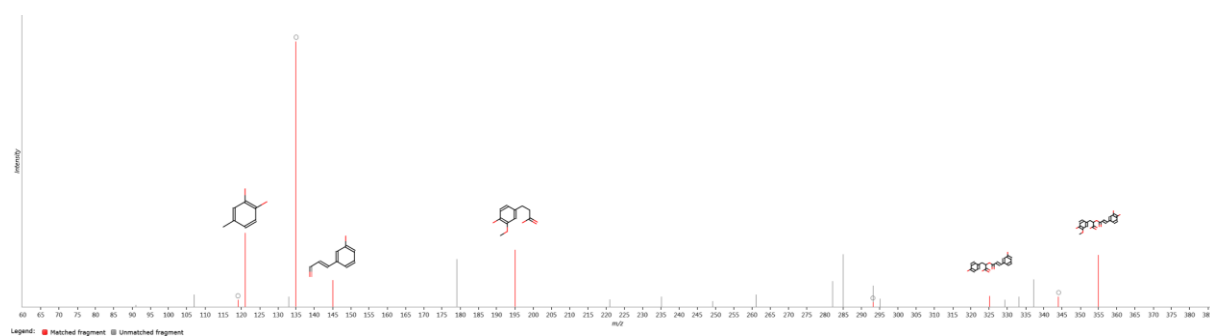

3-O-Methylrosmarinic acid fragmentation trace

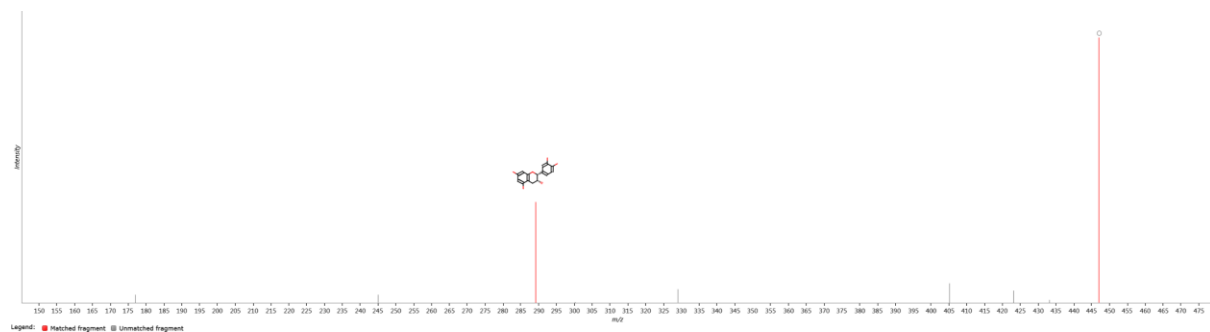

3' or 7-epicatechin-glucuronide fragmentation trace

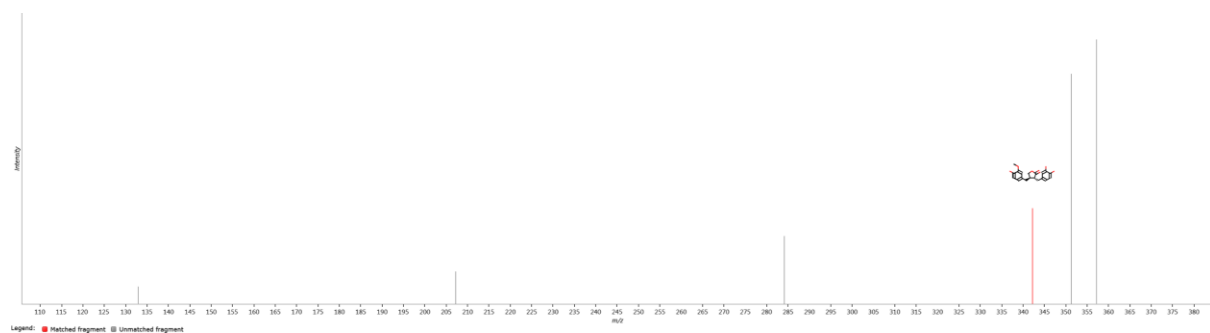

Matairesinol fragmentation trace

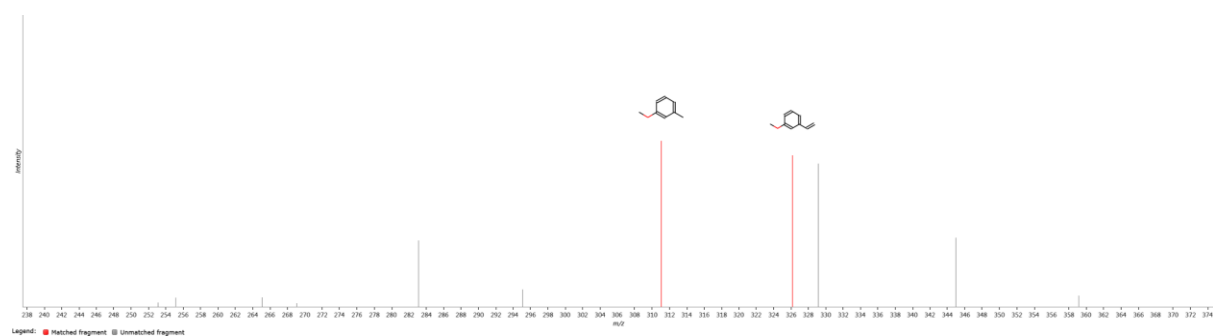

Ferulic acid fragmentation trace

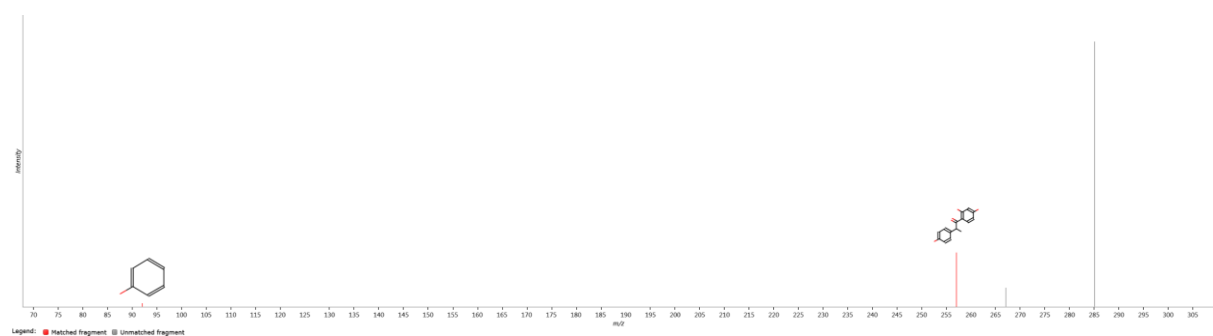

5'-Methoxy-O-desmethylangolensin fragmentation trace

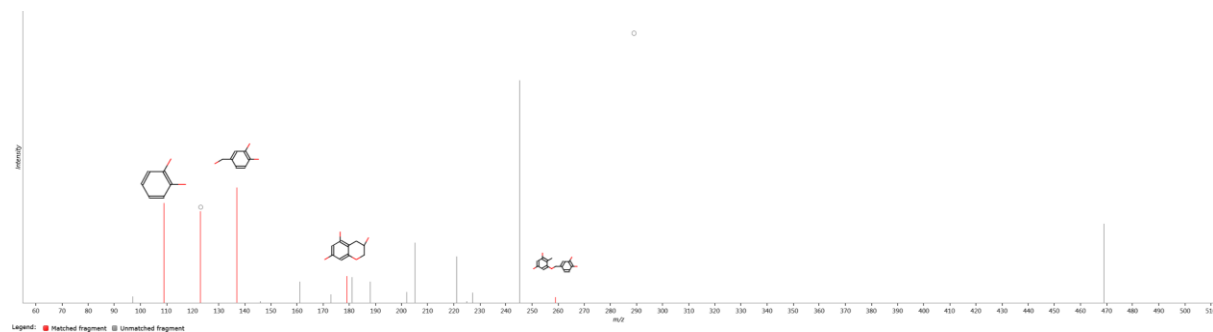

(-)-Epicatechin fragmentation trace

**Figure S10.** Mass spectra of identifications ordered from high to low score value.

Loadings Bi Plot Comp[1] vs. Comp[2] colored by Condition

- Blanks
- Lodge Pole Pine
- Oak
- Pyrogenol
- Scots Pine
- X variables

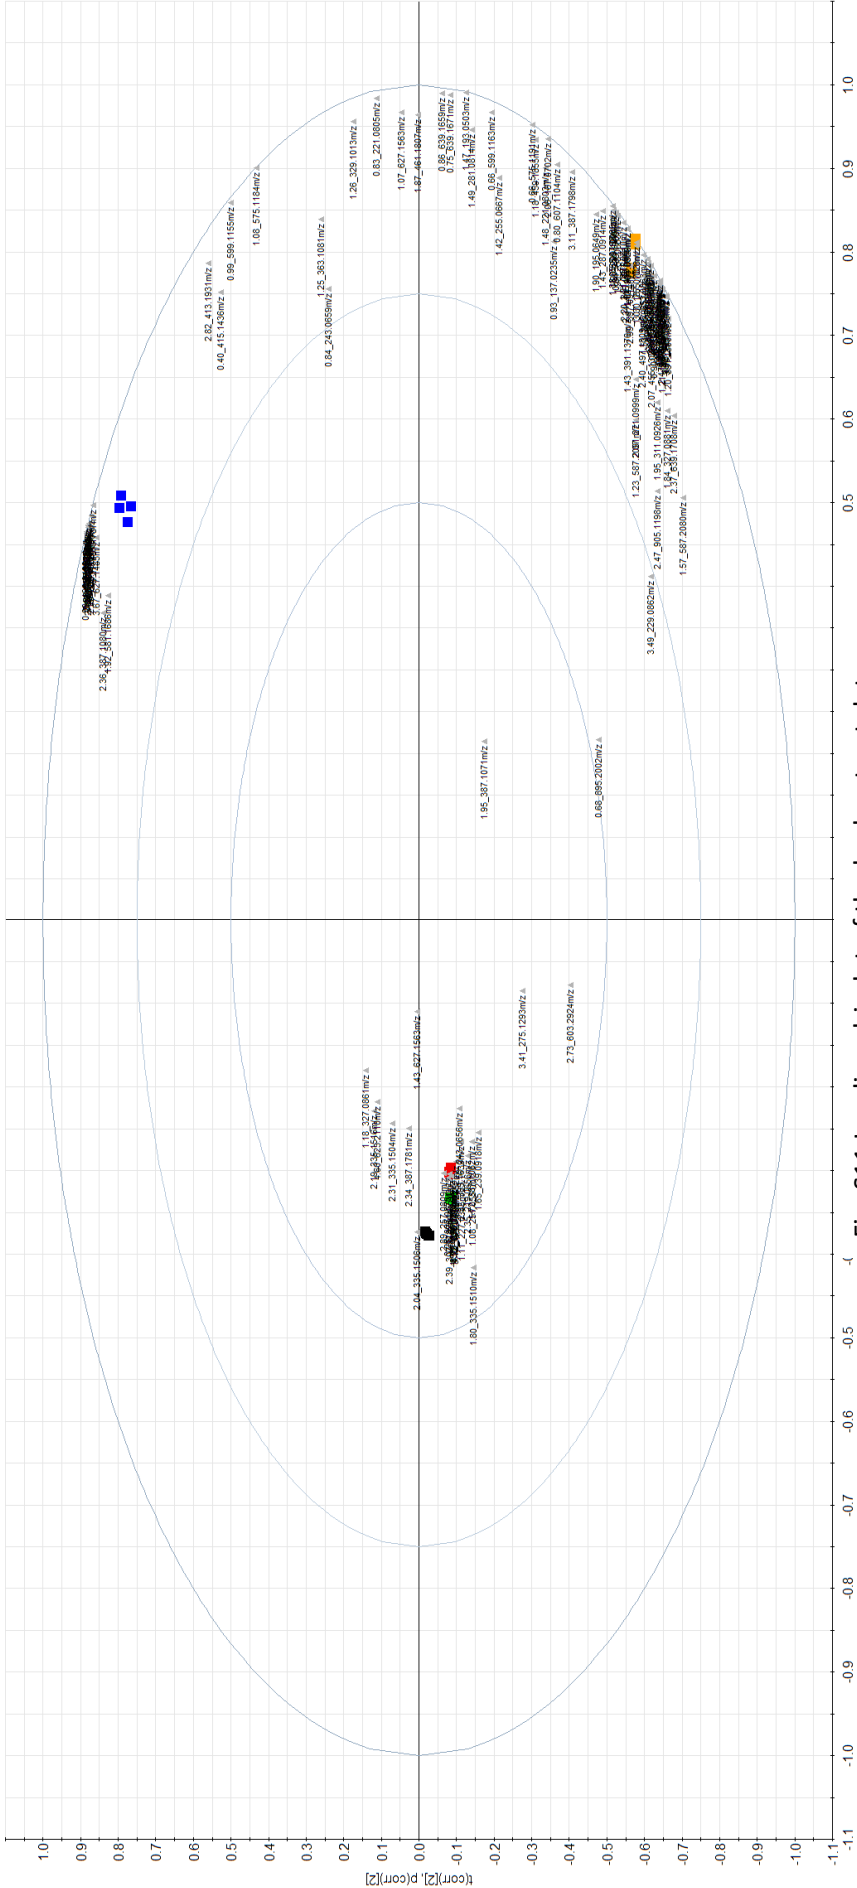

Fig. S11 Loadings bi-plot of the bark extract data.

Figure S11: Bark extracts 2019 after filtering with some (Data up (M1 PCA)) - 2020-10-30 12:36:42 (UTC+0)
